1 **Isolation and Characterization of the Lytic Bacteriophages and**  
2 **Its Application in Combination with Amoxicillin against**  
3 ***Aeromonas dhakensis***

4 **Thanchanok Sawaengwong<sup>a</sup>, Sirinthorn Sunthornthummas<sup>b</sup>, Rinratree Wongyoo<sup>a</sup>,**  
5 **Komwit Surachat<sup>c,d</sup>, Achariya Rangsiruji<sup>e</sup>, Thassanant Atithev<sup>f</sup>, Siriruk**  
6 **Sarawaneeyaruk<sup>a</sup>, Katsumi Doi<sup>g</sup>, Kwannan Nantavisai<sup>h</sup>, Kedvadee Insian<sup>a</sup>, Rattanaruji**  
7 **Pomwised<sup>i</sup>, and Onanong Pringsulaka<sup>a,\*</sup>**

8 <sup>a</sup> Department of Microbiology, Faculty of Science, Srinakharinwirot University, Bangkok,  
9 Thailand 10110

10 <sup>b</sup> National Biobank of Thailand (NBT), National Science and Technology Development  
11 Agency, Pathum Thani, Thailand 12120

12 <sup>c</sup> Department of Biomedical Sciences and Biomedical Engineering, Faculty of Medicine,  
13 Prince of Songkla University, Hat Yai, Songkhla , Thailand 90110

14 <sup>d</sup> Translational Medicine Research Center, Faculty of Medicine, Prince of Songkla  
15 University, Hat Yai, Songkhla , Thailand 90110

16 <sup>e</sup> Department of Biology, Faculty of Science, Srinakharinwirot University, Bangkok,  
17 Thailand 10110

18 <sup>f</sup> Frontier Research Center (FRC) Vidyasirimedhi Institute of Science and Technology  
19 (VISTEC). Wangchan Valley, Rayong, Thailand 21210

20 <sup>g</sup> Laboratory of Microbial Genetic Technology, Department of Bioscience and  
21 Biotechnology, Graduate School of Agriculture, Kyushu University, Fukuoka, Japan 812-  
22 8581

23 <sup>h</sup> Department of Microbiology, Faculty of Medicine, Srinakharinwirot University, Bangkok,  
24 10110, Thailand

25 <sup>i</sup> Division of Biological Science, Faculty of Science, Prince of Songkla University, Songkhla,  
26 Hat Yai, Thailand, 90110

27 \*Corresponding author. Tel: +66 2 649 5000 ext 18517; fax +66 2 260 0127.

28 E-mail address: [onanong@g.swu.ac.th](mailto:onanong@g.swu.ac.th), [opringsulaka@gmail.com](mailto:opringsulaka@gmail.com) (O. Pringsulaka).

29

30 **ABSTRACT** *Aeromonas dhakensis* is the most virulent *Aeromonas* species in tropical and  
31 subtropical areas and causes a variety of human diseases. Owing to its resistance against  
32 some antibiotics, there is an urgent need for new strategies against this pathogen. This is the  
33 first study to isolate and characterize lytic phages against *A. dhakensis*. Of *Aeromonas*  
34 isolates, only isolate AM could be used to isolate phages using the enrichment technique.  
35 This strain was identified via biochemical tests, 16S rDNA sequencing, and whole-genome  
36 analyses. All results confirmed that strain AM was *A. dhakensis*. *In silico* detection of  
37 antimicrobial resistance genes and virulence factors corresponding to the main bacterial  
38 virulence determinants were observed in *A. dhakensis* AM, which was then used as the host for  
39 phage isolation. Four lytic phages, designated vB\_AdhS\_TS3, vB\_AdhM\_TS9,  
40 vB\_AdhM\_DL, and vB\_AdhS\_M4, were isolated. Transmission electron micrographs  
41 showed that vB\_AdhS\_TS3 and vB\_AdhS\_M4 belonged to *Siphoviridae* family, whereas  
42 vB\_AdhM\_TS9 and vB\_AdhM\_DL belonged to *Myoviridae* family. Host-range

43 determination demonstrated that all phages were capable of infecting only *A. dhakensis*.  
44 Three phages, vB\_AdhS\_TS3, vB\_AdhM\_TS9, and vB\_AdhM\_DL, were selected since they  
45 had a shorter latency period and larger burst sizes. All phages were resistant to a wide range  
46 of pH values and remained relatively stable after a 60-minute incubation at 4 °C, 25 °C, 30  
47 °C, and 37 °C but were sensitive to higher temperatures. The pre-treatment (co-inoculation  
48 of *A. dhakensis* and phage) with individual phages and phage cocktails reduced bacterial  
49 numbers in the range of 2.82-6.67 and 5.19-5.43 log CFU/mL, respectively, after 6 h of  
50 incubation. In post-treatment, the maximum inactivation was achieved with the log reduction  
51 of bacterial number in the range of 3.06-5.25 and 4.01-6.49 log CFU/mL after 6 and 12 h of  
52 incubation, respectively. A combination of phage cocktail with amoxicillin at sub-MIC  
53 showed complete inactivation in pre-treatment and post-treatment in a volume of 200 µL;  
54 however, an incomplete inhibition was observed in post-treatment in the volume of 20 mL  
55 but still decreased by about 1.2-1.7 log CFU/mL when compared to the control and other  
56 individuals used after incubation for 48 h. The complete genome and G+C content of phages  
57 vB\_AdhS\_TS3, vB\_AdhM\_DL, and vB\_AdhM\_TS9 were 115,560, 61,429, and 115,503 bp,  
58 respectively, with G+C contents of 41.10%, 61.7%, and 35.34%, respectively. This study  
59 demonstrated using phages as an adjuvant with a sublethal concentration of antibiotics as an  
60 effective therapeutic strategy.

61 **IMPORTANCE** *Aeromonas dhakensis* is widely distributed in the environment and can  
62 cause a variety of infections both in human and animals and is often misidentified with other  
63 members of the *Aeromonas* family, *A. hydrophila*, *A. veronii*, or *A. caviae* using the  
64 commercial test kits which has led to challenges in treating this pathogen. Hence, our study  
65 isolated phages against this bacterial strain and extensively characterized their efficacy with  
66 common antibiotics used to treat the pathogen.

67 **KEYWORDS** Phage therapy, Phage–antibiotic synergy, Bacteriophage, Synergistic effect,  
68 Genome analysis, *Aeromonas dhakensis*, Amoxicillin

69

## 70 **INTRODUCTION**

71 *Aeromonas* species are gram-negative, facultatively anaerobic, rod-shaped  
72 chemoorganotrophs with both oxidative and fermentative metabolism and oxidase- and  
73 catalase-positive bacteria. *Aeromonas* spp. are abundant in aquatic environments and are  
74 found in food, and animals and lead to various infections in humans (1-3). Among the  
75 species, *A. hydrophila*, *A. caviae*, and *A. veronii* were the most prevalent species prior to the  
76 proposal of a new species, *A. dhakensis*. *A. dhakensis* (synonymized with *A. hydrophila*  
77 subsp. *dhakensis* (4) and *A. aquariorum* (5) is often misidentified as *A. hydrophila* (6, 7) by  
78 phenotypic methods (8), and 16S rRNA sequencing is considered unreliable for identifying  
79 *Aeromonas* at the species level (3). This strain has gained increasing interest because it is  
80 widely distributed in the environment and can cause infections such as gastroenteritis, wound  
81 infection, bacteremia, skin and soft-tissue infections, and respiratory infections (9, 10).  
82 Previous studies have shown that *A. dhakensis* was the most virulent *Aeromonas* species in  
83 tropical and subtropical regions (11). It causes soft tissue infection and bacteremia,  
84 especially in individuals with malignancy or liver cirrhosis (12, 13). This species was more  
85 prevalent in countries with hot climates, such as Bangladesh (4), Taiwan (12, 14), Australia  
86 (15), Philippines (formerly *A. hydrophila*) (16), Egypt (17), Malaysia (18) and Thailand (19).  
87 In Thailand, *A. dhakensis* (formerly *A. aquariorum*) was first reported in marine shrimps  
88 cultured in low-salinity inland areas and is the second most prevalent species next to *A.*  
89 *veronii*. *A. dhakensis* contains many virulence factors, including hemolysins and various  
90 extracellular hydrolytic enzymes, which play a significant role in the invasiveness and  
91 establishment of infections (20, 21). Clinical strains have been isolated from stool, blood,

92 wounds, and other extra-intestinal samples of humans worldwide (12). Antibiotic treatment is  
93 critical for preventing and treating infections; however, resistance to antimicrobial agents,  
94 including amoxicillin, cephalothin, and cefoxitin, is rising (8). Moreover, some *A. dhakensis*  
95 can produce biofilms to adhere to different surfaces; thus, treating *A. dhakensis* infections  
96 with common medications becomes further challenging. Therefore, there is a need to develop  
97 alternative treatments for *A. dhakensis* infections other than antimicrobial agents.

98 Bacteriophages are viruses that kill specific bacteria without disturbing other flora.  
99 Bacteriophages are used to control pathogenic bacteria and potential treatments have been  
100 reported for humans, animals, crops, and aquaculture (22-24). Many studies have isolated  
101 phages against *A. hydrophila* and have determined their efficacy for protective and  
102 therapeutic effects against disease (25-28). However, there have been no reports on the  
103 isolation and characterization of lytic phages specific to *A. dhakensis*. The objective of this  
104 study was to isolate and characterize a new lytic phage from water that infects *A. dhakensis*.  
105 This study also investigated the lytic activity of the isolated phage and its combination with  
106 antibiotics against *A. dhakensis in vitro*.

## 107 **RESULTS AND DISCUSSION**

108 ***Aeromonas* isolation and identification.** Three of the 40 isolates from 30 collection  
109 sites were preliminarily identified as *Aeromonas* by biochemical tests. These three  
110 *Aeromonas* strains were then used as hosts for phage isolation. However, only the *Aeromonas*  
111 isolate AM was able to isolate phages using the enrichment technique. The isolated AM was  
112 further characterized using 16S rRNA gene sequence analysis which revealed gene sequences  
113 with a length of 1,546 nucleotides, and overlapped *A. dhakensis* with 99% identity. The  
114 neighbor-joining tree revealed that strain AM was most closely related to *A. dhakensis* (Fig.  
115 1). The biochemical tests of *A. dhakensis* AM are shown in Table 1. However, *A. dhakensis* is

116 often misidentified as *A. hydrophila* since both species can be isolated from *Aeromonas*  
117 isolation agar supplemented with ampicillin. However, we added two biochemical tests (L-  
118 arabinose and salicin fermentation) to differentiate *A. dhakensis* from *A. hydrophila* subsp.  
119 *hydrophila* and *A. hydrophila* subsp. *ranae* (10). The results showed that strain AM was  
120 negative for L-arabinose and positive for salicin fermentation, confirming that this strain is *A.*  
121 *dhakensis*. However, to identify more characteristics, a whole genome sequence analysis of  
122 strain AM was included in this study.

123 **Antimicrobial susceptibility of *A. dhakensis* AM.** The MICs of six antimicrobial  
124 agents against *A. dhakensis* AM were evaluated (Table 2). Amoxicillin had the highest MIC  
125 of 24 µg/mL among the antibiotics, much higher than the CLSI MIC breakpoints (>8 µg/mL).  
126 As the information about the susceptibility profiles of *A. dhakensis* is rare, our findings show  
127 that *A. dhakensis* AM is susceptible to chloramphenicol, doxycycline, and gentamicin. From  
128 *in silico* genome analyses, tetracycline resistance genes were identified in the genome of *A.*  
129 *dhakensis* AM (data not shown); however, the MIC value of tetracycline was intermediate  
130 (12 µg/mL) (Table 5). Aeromonads are usually susceptible to 4<sup>th</sup>-generation cephalosporins,  
131 aminoglycosides, fluoroquinolones, tetracycline, and trimethoprim-sulfamethoxazole (15, 50,  
132 51). However, increasing resistance rates to fluoroquinolones, tetracyclines, and  
133 trimethoprim-sulfamethoxazole have been reported (52-54). According to Chen et al. (2014)  
134 (12), all strains of *A. dhakensis* (n=37) were susceptible to gentamicin, and 90% of isolates  
135 gave the MIC of 0.5 µg/mL, which was similar to our study. A few antimicrobial agents  
136 (oxytetracycline, amoxicillin, sulfadimethoxine/ormetoprim, and enrofloxacin) have been  
137 approved for use in aquaculture in Thailand (55). The results of this study indicated that the  
138 resistance rate to amoxicillin was per Aravena-Roman et al. (2011) (56), who reported that  
139 only 1.6% of 193 *Aeromonas* isolates were susceptible to amoxicillin. Therefore, we used  
140 amoxicillin at sub-MIC to evaluate the synergism between the antibiotics and phage cocktail.

141           **Genomic features of *A. dhakensis* AM.** The *in silico* genome of *A. dhakensis* AM  
142 comprises one circular chromosome of 4,884,279 bp with a G+C content of 61.9% (Fig. 2,  
143 Table 3). The genome contained 4,256 coding DNA sequences (CDSs). We emphasized the  
144 antimicrobial resistance genes and virulence factors corresponding to the main bacterial  
145 virulence determinants. Antimicrobial resistance genes were identified in the genome of *A.*  
146 *dhakensis* AM (data not shown). Genes for antibiotic inactivation were identified, including  
147 members of the resistance-nodulation-cell division (RND) antibiotic efflux pump, major  
148 facilitator superfamily (MFS) antibiotic efflux pump, small multidrug resistance (SMR),  
149 AQU beta-lactamase, OXA beta-lactamase, elfamycin resistant EF-Tu, and gene antibiotic  
150 target alterations. Virulence factor genes were identified in the genome of *A. dhakensis* AM  
151 (data not shown). Several type II secretion system (T2SS) component genes and type VI  
152 secretion system (T6SS) with T6SS effectors, including two hemolysin-coregulated (*hcp*) and  
153 two valine-glycine repeats G (*vgrG*), have been identified, suggesting that T6SS can play a  
154 role in the pathogenicity of this strain. Several typical toxin-encoding genes have been  
155 identified, including aerolysin (*aerA*), extracellular hemolysin (*ahh1*), hemolysin (*hlyA*),  
156 hemolysin III, repeat in toxin (*rtxA*, *rtxB*, *rtxC*, *rtxD*, *rtxE*, and *rtxH*), thermostable  
157 hemolysin, and exotoxin A (*toxA*). Five prophages were identified in the genome (data not  
158 shown), and no plasmids were found during genome analysis.

159           **Phage isolation, purification and phage morphology.** Four phages, designated as  
160 vB\_AdhS\_TS3, vB\_AdhM\_TS9, vB\_AdhM\_DL, and vB\_AdhS\_M4 were isolated using *A.*  
161 *dhakensis* AM as the host. The phages were purified using three successive single-plaque  
162 isolations. These phages exhibited clear plaques with diameters ranging from 1.7 to 2.0 mm  
163 (Fig. 3). Electron micrographs revealed that two isolated phages vB\_AdhS\_TS3 and  
164 vB\_AdhS\_M4 belonged to the family *Siphoviridae*, displaying an icosahedral head of  
165 approximately 75.2 nm and 64.8 nm, respectively, a contractile tail with the length of 225.3



166 nm and 185.4 nm, respectively. Phages vB\_AdhM\_DL and vB\_AdhM\_TS9 belonged to the  
167 family *Myoviridae*, possessing an icosahedral head with dimensions of 50.4 and 85.1 nm,  
168 respectively and a tail length of 210.4 nm and 101.4 nm, respectively (Fig. 3). Bai et al.  
169 (2019) (57) reported that from 51 complete genome sequences of *Aeromonas* phages in  
170 GenBank, the majority of *Aeromonas* phages were double-strand DNA phages belonging to  
171 the *Myoviridae* (33/51), *Podoviridae* (7/51) and *Siphoviridae* (5/51) families, along with one  
172 ssDNA virus and five unclassified bacteriophages (58-63).

173 **Host range determination.** All phages were infected only with *A. dhakensis* and did  
174 not infect other *Aeromonas* spp., such as *A. hydrophila*, *A. caviae*, *A. sobria*, *A. trota*, or *A.*  
175 *veronii* (Table 4). Bacteriophage vB\_AdhM\_DL is the broadest host range phage, able to  
176 infect *A. dhakensis* in five out of the six strains tested. However, for future applications, there  
177 is a need to search for additional *A. dhakensis* hosts. Our results indicate that all phages are  
178 species-specific, as reported elsewhere for most *Aeromonas* phages (64).

179 **Optimal multiplicity of infection determination (MOI) and one-step growth**  
180 **curve.** Phage vB\_AdhS\_TS3, vB\_AdhM\_DL, vB\_AdhS\_M4 and vB\_AdhM\_TS9  
181 generated a maximum titre of  $9.68 \pm 0.05$ ,  $9.94 \pm 0.05$ ,  $10.41 \pm 0.06$  and  $8.85 \pm 0.25$  PFU/mL  
182 when infected at an optimal MOI of 10 (Table 5). A one-step growth curve of the phages  
183 vB\_AdhS\_TS3, vB\_AdhM\_DL, vB\_AdhS\_M4, and vB\_AdhM\_TS9 was obtained by  
184 propagation on *A. dhakensis* AM as the host at 37 °C (Fig. 4). The latent period of phages  
185 vB\_AdhS\_TS3, vB\_AdhM\_DL, vB\_AdhS\_M4, and vB\_AdhM\_TS9 was approximately 40,  
186 30, 50, and 30 min, respectively, and the burst sizes of phage vB\_AdhS\_TS3,  
187 vB\_AdhM\_DL, vB\_AdhS\_M4, and vB\_AdhM\_TS9 were estimated as 1380, 1280, 253, and  
188 6300 PFUs/infected cells, respectively. Several parameters affect phage therapy, including  
189 burst size, latent period, and initial phage dose (65-67). Apart from a wide host range, phages  
190 with short latent periods and/or high burst sizes are preferred as biocontrol agents. Among the



191 four phages, phage vB\_AdhS\_M4 had the longest latent period, smallest burst size, and  
192 narrowest host range. Therefore, we selected the other three phages, vB\_AdhS\_TS3,  
193 vB\_AdhM\_DL, and vB\_AdhM\_TS9, for further studies.

194 **pH and thermal stability.** The pH and thermal stability of phages were determined  
195 by the change in the number of plaque-forming units (PFU). As shown in Fig.5, all phages  
196 were resistant to a wide range of pH values after 2 h of incubation, and the optimum range  
197 was pH-6-8 (Fig. 5). However, phages vB\_AdhS\_TS3 and vB\_AdhM\_DL showed a  
198 significant decrease at pH 3 and 12, whereas phage vB\_AdhM\_TS9 was inactivated at pH 12.  
199 No plaques were seen at pH 2.

200 The thermal stability of the isolated phages was determined at pH 7.0. Figure 6 shows  
201 that all the phages remained relatively stable after a 60-min incubation at 4 °C, 25 °C, 30 °C,  
202 and 37 °C but were sensitive to higher temperatures (Fig. 6). At 100 °C, phage  
203 vB\_AdhS\_TS3 was completely inactivated within 5 min, whereas phages vB\_AdhM\_DL and  
204 vB\_AdhM\_TS9 were undetectable after 10 min (Fig. 7).

205 **Whole-genome sequencing of phages and *in silico* analysis.** The genome size of  
206 vB\_AdhS\_TS3 was 115,560 bp with a G + C content of 41.10%. BLASTn analysis showed  
207 that the genome sequence of vB\_AdhS\_TS3 had the highest similarity to that of *Aeromonas*  
208 phage Akh-2 (81.90%). Furthermore, vB\_AdhS\_TS3 encodes 30 transfer-RNAs (tRNA), as  
209 shown in Table 6. With regards to the gene function, the open reading frames (ORFs) of  
210 vB\_AdhS\_TS3 were identified by BLASTp, and a total of 151 ORFs were predicted. Among  
211 these genes, 30 were predicted to have known functions (Table 7, Fig 8A), and 121 ORFs  
212 were predicted to encode hypothetical proteins. Similarly, the genome size of  
213 vB\_AdhM\_TS9 was 115,503 bp, with a G + C content of 35.34%, and encoded 195 proteins.  
214 BLASTn analysis showed that the genome sequence of vB\_AdhM\_TS9 had the highest

215 similarity to the *Aeromonas* phage phiA047 (94.43%). Phage vB\_AdhM\_TS9 does not  
216 appear to encode tRNA genes. Out of 195 ORFs, 175 ORFs were hypothetical, whereas only  
217 25 ORFs predicted functions (Table 8, Fig 8B). The genome size of vB\_AdhM\_DL was  
218 42,388 bp, with a G+C content of 34.43% and 75 proteins, respectively. BLASTn analysis  
219 showed that the genome sequence of vB\_AdhM\_DL had the highest similarity to the  
220 *Aeromonas* phage phiA019 (94.43%). Of the 75 encoded proteins, Only 9 out of 75 encoded  
221 predicted functions, whereas 66 ORFs were hypothetical (Table 9, Fig 8C). We did not find  
222 an ORF encoding a protein with known toxins, antibiotic-resistant genes (ARGs), virulent  
223 factors (VFs) of bacterial origin, or lysogenic markers such as integrase, recombinase,  
224 repressor/anti-repressor protein, and excisionase in all three phage genomes. Furthermore,  
225 PhageAI was used to classify vB\_AdhS\_TS3, vB\_AdhM\_TS9, and vB\_AdhM\_DL as  
226 virulent (lytic phage), with high confidence (99.10%, 90.70% and 91.21% respectively).

#### 227 **Effect of single in pre- and post-treatment to control *A. dhakensis* AM growth.**

228 The lytic effect of individual phages on the growth of *A. dhakensis* AM was evaluated at  
229 different MOIs. Both pre-and post-treatment, the maximum cell decrease for all phages was  
230 observed during 6-12 h of incubation at all MOIs compared with the uninfected bacterial  
231 control. The pre-treatment with phages vB\_AdhS\_TS3, vB\_AdhM\_DL, and  
232 vB\_AdhM\_TS9 reduced the maximum bacterial count by 5.40, 6.67 and 3.91 log CFU/mL,  
233 respectively, after 6 h of incubation. In post-treatment, the maximum inactivation was  
234 achieved at 12 h with the log reduction number of 4.68, 5.25 and 4.43 log CFU/mL,  
235 respectively. The growth of bacteria cultured with phages decreased remarkably depending  
236 on the regrowth of bacteria at 48 h in all treatments. The maximum growth of the bacterial  
237 control was approximately 6-7 log CFU/mL after 48 h of incubation (Fig. 9), whereas the  
238 CFU levels of the experimental group treated with only phage remained constant throughout.  
239 When the phages were incubated in the presence of the host, the phages gradually increased

240 and then became stable over 48 h of incubation. Based on the maximum inhibition, the  
241 combination of two phages as a phage cocktail in pre- and post-treatment with optimal MOIs  
242 was chosen, as shown in Fig. 10.

243 **Effect of phage cocktail in pre- and post-treatment to control *A. dhakensis* AM**  
244 **growth.** The effectiveness of the phage cocktail in the reduction of *A. dhakensis* AM is  
245 shown in Fig. 10. Cocktail 3, composed of phages vB\_AdhM\_TS9 and vB\_AdhM\_DL, was  
246 more effective against *A. dhakensis* AM than the other cocktails. Upon pre-treatment, the  
247 maximum inactivation with cocktail 3 (vB\_AdhM\_TS9 (MOI 1)+ vB\_AdhM\_DL (MOI  
248 0.1)) was  $5.08 \pm 0.51$  log CFU/mL after 6 h of incubation compared with uninfected control.  
249 In post-treatment, the maximum reduction with cocktail 3 (vB\_AdhM\_TS9 (MOI 1) +  
250 vB\_AdhM\_DL (MOI 1)) was  $4.71 \pm 0.49$  log CFU/mL after 12 h of incubation when  
251 compared with those of the bacterial control. Bacterial regrowth was observed at 24 h in all  
252 treatments. The phage alone was constant throughout the experiment. Although phage  
253 cocktails are promising for preventing the emergence of phage-resistant mutants, the  
254 incubation of phages and bacteria for longer periods may result in the appearance of phage-  
255 resistant strains (68). Therefore, the combination of phages and antibiotics has also been  
256 studied to minimize the negative side effects of antibiotics.

257 ***A. dhakensis* growth inhibition by phage cocktail and antibiotics combination.** To  
258 establish the phage-antibiotic synergy (PAS) effect, we determined the bacterial inactivation  
259 by three combinations of phage cocktails with amoxicillin at sub-MIC (32  $\mu$ g/mL) in  
260 different volumes (200  $\mu$ L and 20 mL). In the presence of amoxicillin and phage alone, the  
261 antibiotic- and phage-resistant variants rapidly grew after 6 h of incubation. In the pre-  
262 treatment, the combination of phage cocktail 1 or 2 with amoxicillin at sub-MIC resulted in  
263 complete inhibition during 48 h and 12 h in a volume of 200  $\mu$ L and 20 mL, respectively  
264 (Fig. 11). At a volume of 20 mL, a significant reduction in bacterial numbers was observed

265 when treated with a combination of phage cocktail 1 or 2 and sub-MIC amoxicillin at 48 h of  
266 incubation ( $p < 0.05$ ). After post-treatment, the combination of phage cocktail 1 or 2 with  
267 amoxicillin at sub-MIC resulted in complete inhibition for 48 h in 200  $\mu$ L (Fig. 12).  
268 However, only partial inhibition was observed after 12 h at a volume of 20 mL. Bacterial  
269 regrowth gradually increased after 12 h, and no significant reduction in viable bacteria was  
270 observed after 48 h of incubation compared to the phage cocktail of antibiotics alone. In this  
271 study, the bacterial concentration in this treatment ( $1 \times 10^5$  CFU/mL) was much higher than  
272 in natural bacterial contamination. Moreover, this study was performed in a higher volume of  
273 medium (20 mL), which may reduce the interaction between phages and/or antibiotics before  
274 reaching the bacteria. However, phage cocktails 1 and 2 decreased the CFU 1.2-1.7 log  
275 CFU/mL compared to the control and other groups treated individually after incubation for  
276 48 h. Our study strongly suggests that the synergistic antibacterial effects of antibiotics and  
277 phages should be performed in the early stages when the bacterial number is low. This  
278 indicates the very efficient inactivation of bacteria by the antibiotic at sub-MIC in  
279 combination with the phage cocktail. The first use of the phage-antibiotic synergy (PAS)  
280 strategy was described by Comeau (2007) (69). Sublethal concentrations of antibiotics may  
281 help lytic bacteriophages reproduce rapidly and promote their antibacterial effects. Moreover,  
282 when bacteriophages are used in combination with antibiotics, there may be a profound order  
283 effect; bacteriophage treatment implemented before drug treatment results in maximum  
284 bacterial killing.

285 Our study demonstrates that phage-based approaches are an attractive way to  
286 inactivate *A. dhakensis in vitro*. The cocktail of three different bacteriophages (phage  
287 vB\_AdhS\_TS3, vB\_AdhM\_DL and vB\_AdhM\_TS9) revealed promising *in vitro* lytic  
288 activity on *A. dhakensis*. Furthermore, the combination therapy using phage cocktails and  
289 antibiotics showed greater promise compared with either therapy alone. Moreover,

290 combination therapy can also prevent the development of resistant mutants that would  
291 otherwise develop rapidly when exposed to antibiotics or phages. This demonstrates that  
292 using phages as an adjuvant with a sublethal concentration of antibiotics is an effective  
293 therapeutic strategy.

294

## 295 MATERIALS AND METHODS

296 **Bacterial strains and culture conditions.** All *Aeromonas* strains and other  
297 *Aeromonas* reference strains were grown on nutrient agar (NA) plates or in nutrient broth  
298 (NB) (HiMedia, India). All *Aeromonas* stock cultures were stored at -20 °C in NB containing  
299 20% (v/v) glycerol. Before use, frozen cultures were cultivated at 30 °C with shaking at 200  
300 rpm in NB. The culture broth was then streaked on NA, and a single colony was transferred  
301 to the NA slant for further study.

302 **Isolation of *Aeromonas*.** To isolate *Aeromonas* species, 30 samples were collected  
303 from different sources, including fishponds, canal water, and rivers in Bangkok, Thailand. All  
304 samples were collected in sterile bottles, stored in a cooler, and transported to the laboratory  
305 for analysis. The samples were streaked onto an *Aeromonas* isolation medium (HiMedia,  
306 India) supplemented with ampicillin. The plates were incubated for 24 h at 30 °C. The dark  
307 green, opaque, dark center colonies resembling *Aeromonas* sp. were re-streaked on fresh  
308 *Aeromonas* isolation medium until a pure culture was obtained. The pure isolates were  
309 subjected to gram staining, nitrate reduction test, glucose OF (oxidation-fermentation) test,  
310 and oxidase and catalase test. Gram-negative bacteria capable of degrading nitrates to nitrites,  
311 glucose fermenters, oxidase, and catalase-positive isolates resembling the genus *Aeromonas*  
312 were selected for 16s rRNA gene sequencing analysis. Other biochemical tests were used to  
313 differentiate between *Aeromonas* genera. L-arabinose fermentation was also differentiated

314 between *A. hydrophila* and *A. dhakensis*. Likewise, salicin fermentation allowed  
315 differentiation between *A. hydrophila* and *A. dhakensis* from *A. hydrophila* subsp. *ranae* (10).  
316 Hemolysis test was performed on Columbia agar supplemented with sheep blood. All  
317 *Aeromonas* spp. isolates were stored at 20 °C in nutrient broth (NB) (Himedia, India)  
318 supplemented with 20% glycerol until further use.

319 **Identification of *Aeromonas* spp.** The genomic DNA of the *Aeromonas* isolate was  
320 extracted using an AccuPrep® Genomic DNA Extraction Kit (Bioneer, Korea) following the  
321 manufacturer's instructions and used as templates for PCR amplification. A pair of universal  
322 primers, 27F:5'-AGAGTTTGATCCTGGC TCAG-3' and 1492R:5'-  
323 GGCTACCTTGTTACGACTT-3' was used to amplify the 16S rRNA gene. PCR  
324 amplification was performed in a thermal cycler ((Mastercycler, Eppendorf, USA) using the  
325 conditions described by Pringsulaka, Patarasinpaiboon, Suwannasai, Atthakor, & Rangsiruji  
326 (2011) (29). The amplification products were separated on a 0.6% agarose gel and visualized  
327 under UV light after staining with ethidium bromide (1 mg/mL). A MinElute Gel Extraction  
328 Kit (Qiagen, USA) was used to purify the 16S rDNA fragments, which were sequenced and  
329 compared to the GenBank database using the Basic Local Alignment Search Tool (BLAST).  
330 Phylogenetic trees were established using the neighbor-joining method in the MEGA 5.1  
331 software package following Han et al. (2017) (30). The amplification products obtained based  
332 on the 16S rDNA specific for *the A. hydrophila* gene primers were compared with the  
333 corresponding PCR fragments of the reference strain of *A. hydrophila* TISTR 1321.

334 **Antimicrobial susceptibilities of *Aeromonas* isolates.** *Aeromonas* isolates were  
335 cultured on nutrient agar (Himedia, India) for 24 h at 30 °C, after which a suspension was  
336 prepared in sterile saline, adjusted to 0.5 McFarland standard, and diluted to reach a final  
337 bacterial inoculum concentration of  $5 \times 10^5$  CFU/mL. Next, 100 µL was spread onto Mueller  
338 Hinton (MH) agar plates (Himedia, India). Then, the MIC test strips containing amoxicillin,

339 chloramphenicol, doxycycline, gentamicin, and tetracycline (Liofilchem® MTS™, Italy)  
340 were placed at the center of the plate and incubated for approximately 24 h at 30 °C. The  
341 results were then read by evaluating the ellipsoid zones of bacterial growth inhibition and  
342 examining the intersection of this zone and the concentration mark on the test strip, which  
343 indicated the MIC. The interpretative criteria were derived from those described by the  
344 Clinical and Laboratory Standards Institute (CLSI) VET04 (31).

345 **Phage isolation and detection.** The isolated *Aeromonas* strains were used as hosts  
346 for bacteriophage isolation. Fresh overnight cultures of *Aeromonas* were propagated in 25  
347 mL of double-strength NB in a 250-mL Erlenmeyer flask for 4-6 h. Then, 25 mL of canal and  
348 fishpond samples were added and further incubated at 30 °C for 24 h. The culture broth was  
349 centrifuged at 8000xg for 10 min, and the supernatant was filtered using a 0.45-µm pore-size  
350 syringe filter. The double-layer agar plate method was used on NA medium to determine the  
351 presence of phages (32, 33). Bacteriophage plaques were enumerated after overnight  
352 incubation at 30 °C and calculated as plaque-forming units (PFU/mL). Single plaques were  
353 isolated and purified by picking plaques into 300 µL of the NB containing early exponential  
354 phase *Aeromonas* spp. and incubating at 30 °C overnight. This step was repeated three times  
355 to ensure the isolation of a pure phage. Phage stocks were prepared in NB supplemented with  
356 30 mM CaCl<sub>2</sub> (NB-Ca) and then stored in a dark bottle at 4 °C.

357 **Electron microscopy.** Phage morphology was visualized by transmission electron  
358 microscopy (TEM). Carbon-formvar-coated grids were gently placed on fresh overnight  
359 plaques and negatively stained with 1% (w/v) uranyl acetate (pH 4.5). Phage morphology  
360 was examined using a TECNAI 20 TWIN transmission electron microscope operated at 120  
361 kV and a magnification of x120,000.



362           **Host-range determination.** The host range of the isolated phages was determined  
363 using the spot test method (34). Other reference strains of aeromonads were tested for  
364 susceptibility to phages. Briefly, 100  $\mu$ L of each reference strain ( $OD_{600} = 1$ ) was added to 4  
365 mL of liquefied NB soft agar (NB broth with 0.5% agar), mixed gently, and poured over the  
366 NA plate. After the agar solidified, 10  $\mu$ L of phage filtrate was spotted onto NB soft agar and  
367 incubated overnight at 30 ° °C and bacterial sensitivity to the phage was indicated by a  
368 plaque at the spot. The clarity of the spots was recorded into three categories: clear  
369 (transparent) spots (++), turbid spots (+), and no lysis zones (-).

370           **Determination of optimal multiplicity of infection (MOI).** A host strain suspension  
371 ( $10^8$  CFU/mL) in NB was mixed with the phage stock at four different ratios (0.01, 0.1, 1, and  
372 10 PFU/CFU) to determine the optimal MOI. After 3.5 h incubation at 30 °C, the samples  
373 were harvested and assayed to determine the phage titer using the double-layer agar plate  
374 method (29). The ratio with the highest phage titer was the optimal MOI.

375           **One-step growth curve experiments.** A one-step growth curve for each phage  
376 isolate was performed as Sunthornthummas et al (2017) (35) with some modifications. *The A.*  
377 *dhakensis* culture ( $10^8$  CFU/mL) was resuspended in 1 ml of NB and incubated with an equal  
378 volume of phage ( $10^7$  PFU/mL) to generate an MOI of 0.1. After 10 min of adsorption at  
379 37°C, the suspension was filtered through a 0.45  $\mu$ m pore size syringe filter. Unadsorbed  
380 phages were removed from the filter membrane by washing the filter several times with MRS  
381 broth. Infected cells were harvested and resuspended in 20 ml of MRS broth. An aliquot of  
382 each dilution was withdrawn at intervals for phage counts using the double-layer agar plate  
383 method (36). The latent period, rise period, and burst size were calculated using the one-step  
384 growth curve (32).

385           **pH and thermal stability.** For the pH stability tests, NB was pre-adjusted to a wide  
386 range of pH values (pH 2.0, 3.0, 4.0, 5.0, 8.0, 9.0, 10.0, and 11.0) with 1N HCl or 1N NaOH.  
387 A phage suspension ( $10^{10}$  PFU/mL) was inoculated and incubated. After 90 min of incubation  
388 at 30 °C, the phage titer was determined using the double-layer agar plate method. For  
389 thermal inactivation experiments, phage lysates ( $10^{10}$  PFU/mL) were subjected to heat  
390 treatment at 4, 30, 37, 45, 63, 72, and 100 °C in NB. The tubes were harvested at regular  
391 intervals and placed in an ice-water bath. The phage titer was determined using the double-  
392 layer agar plate method, and the phage survival rates were calculated by dividing the PFU at  
393 each time point by that at the primary PFU. All tests were performed in triplicates.

394           **Whole Genome sequencing and *in silico* analyses.** Genomic DNA of *Aeromonas* sp.  
395 AM was extracted using an AccuPrep Genomic DNA Extraction Kit (Bioneer, Daejeon,  
396 Korea). Phage DNA was isolated as previously described (35). The phage DNA pellet was  
397 resuspended in 100 µL TE buffer (pH 8.0). The concentration and DNA quality were  
398 evaluated using a NanoDrop™ 2000 spectrophotometer (Thermo Fisher Scientific, USA).  
399 High-purity genomic DNA with an OD<sub>260</sub>/OD<sub>280</sub> ratio of 1.8–2.0 and an OD<sub>260</sub>/OD<sub>230</sub> ratio of  
400 2.0–2.2 was used for whole-genome sequencing. The purified genomic DNA was sent to the  
401 Beijing Genomics Institute (BGI) in China for short-read sequencing.

402           *De novo* assembly of *Aeromonas* sp. AM and three phage genome sequences were  
403 constructed using SPAdes 3.12 (37). The quality of the reads was investigated using  
404 FASTQC (38) and trimmed with Trimmomatic 0.39 (39). Functional annotation was  
405 performed using Prokka v1.14 (40) and tRNAs and rRNAs were identified using tRNAscan-  
406 SE 2.0 (41).

407           **Bioinformatics analyses.** Nucleotide and amino acid sequences were compared using  
408 Blastn software. Translated open reading frames (ORFs) were compared to the non-redundant

409 GenBank protein database using the Blastp software. Additionally, the genomic DNA of  
410 *Aeromonas dhakensis* AM and three phages were screened for the presence of virulence  
411 genes using the Virulence Factors of Pathogenic Bacteria (VFDB) (42), Comprehensive  
412 Antibiotic Resistance Database (CARD) databases (43), and PlasmidFinder 2.1 (44, 45).  
413 PHASTER was used to identify prophages in bacterial genomes (46, 47), and the lifestyles of  
414 the three phages were predicted computationally using PhageAI (<https://phage.ai/>) (48). The  
415 genome of *Aeromonas* sp. AM and the three phages were visualized using the (CGView)  
416 (<https://beta.proksee.ca/>) webserver (49).

417 **Accession Numbers.** The genome sequences of *Aeromonas dhakensis* AM were  
418 deposited in the NCBI database under accession number JAPHNH000000000, and the  
419 genome sequences of phage vB\_AdhS\_TS3, vB\_AdhM\_TS9, and vB\_AdhM\_DL were  
420 deposited in the NCBI database under accession number OP820700, OP820701 and  
421 OP820702, respectively.

422 ***A. dhakensis* growth inhibition by single phage and phage cocktail *in vitro*.** Phage  
423 therapy was divided into two treatments: pre- and post-treatment. In the pre-treatment  
424 experiment, phage vB\_AdhS\_TS3, vB\_AdhM\_TS9, vB\_AdhM\_DL, and vB\_AdhS\_M4 or  
425 phage cocktail were added before inoculation with *A. dhakensis* AM ( $1 \times 10^8$  CFU/mL),  
426 resulting in MOIs of 0.1, 1, and 10, respectively. In the post-treatment experiment, *A.*  
427 *dhakensis* AM suspensions ( $1 \times 10^8$  CFU/mL) were inoculated into NB and incubated for 3 h  
428 (logarithmic growth phase). Equal volumes of phage vB\_AdhS\_TS3, vB\_AdhM\_TS9,  
429 vB\_AdhM\_DL, and vB\_AdhS\_M4 or phage cocktail were added at MOIs of 0.1, 1, and 10,  
430 respectively. Both treatments were performed in a 250 mL Erlenmeyer flask containing 50  
431 mL of NB at 200 rpm and incubated at 30 °C for 48 h. For each assay, two control samples  
432 were set: the bacterial control and the phage control. The bacterial control was inoculated  
433 with *A. dhakensis* but not phages, and the phage controls were inoculated with phages but not

434 bacteria. The control and test samples were incubated under the same conditions. Aliquots of  
435 the test samples and their controls were sampled at 0, 6, 12, and 24 h of incubation. In all  
436 assays, phage titer was determined in triplicate using the double-layer agar plate method. The  
437 bacterial concentration was determined in triplicate in the NA medium. Three independent  
438 experiments were performed for each condition.

#### 439 ***A. dhakensis* growth inhibition by phage cocktail and antibiotics combination**

440 The inhibitory effects of the selected two-phage cocktail with effective MOIs in  
441 combination with antibiotics at sub-MIC (1/2 MIC) were determined as previously described.  
442 In the pre-treatment experiment, a combination of the selected two-phage cocktail with  
443 effective MOIs and amoxicillin at sub-MIC was added before inoculation with *A. dhakensis*  
444 AM ( $1 \times 10^5$  CFU/mL). In the post-treatment experiment, *A. dhakensis* AM suspensions ( $1 \times$   
445  $10^5$  CFU/mL) were inoculated into NB and incubated for 3 h. Equal volumes of the selected  
446 three-phage cocktail with effective MOIs and amoxicillin at sub-MICs were added. Only the  
447 phage cocktail and antibiotics at MIC were also administered in both pre-and post-treatment.  
448 For each assay, two control samples were set up: one containing only bacteria and the other  
449 containing only phage. Phage and bacterial counts were determined in NB in two different  
450 volumes: 200  $\mu$ L in 96-well microtiter plates and 20 mL in 250 mL Erlenmeyer flasks. The  
451 latter was incubated on an orbital shaker with a shaking speed of 200 rpm. After incubation at  
452 30°C, the aliquots of each sample and their controls were collected every 6 h for 48 h and  
453 were serially diluted to determine viable bacteria (CFU/mL) in NA plates incubated for 24 h  
454 at 30°C. The experiment was performed in triplicate.

455 **Statistical Analysis.** Statistically significant differences in all experiments were  
456 determined by one-way analysis of variance (ANOVA), and post-hoc Tukey's test was  
457 applied to illustrate significant differences between bacterial concentrations between

458 treatment groups over time. A p-value <0.05 was considered to indicate statistical  
459 significance. SPSS statistical software package (version 13.0) was used for all analyses.

460

#### 461 **ACKNOWLEDGEMENT**

462 This work was supported by an annual government statement of expenditure,  
463 Srinakharinwirot University (grant number 031/2564), and graduate school fund, Faculty of  
464 Science, Srinakarinwirot University.

465

#### 466 **REFERENCES**

- 467 1. Martin-Carnahan A, Joseph SW. 2007. Order XII. Aeromonadales ord. nov., p 556–578. *In*  
468 Brenner DJ, Krieg NR, Staley JT, Garrity GM (ed), *Bergey's Manual of Systematic*  
469 *Bacteriology*, Springer Science & Business Media, Philadelphia, PA.
- 470 2. Figueras MJ, Suarez-Franquet A, Chacon MR, Soler L, Navarro M, Alexandre C, Grasa B,  
471 Martínez-Murcia AJ, Guarro J. 2005. First record of the rare species *Aeromonas culicicola* from  
472 a drinking water supply. *Appl Environ Microbiol* 71:538–541.
- 473 3. Janda JM, Abbott SL. 2007. 16S rRNA Gene sequencing for bacterial identification in the  
474 diagnostic laboratory: Pluses, perils, and pitfalls. *J Clin Microbiol* 45:2761–2764.
- 475 4. Huys G, Kampfer P, Albert MJ, Kuhn I, Denys R, Swings J. 2002. *Aeromonas hydrophila*  
476 subsp. *dhakensis* subsp. nov., isolated from children with diarrhoea in Bangladesh, and  
477 extended description of *Aeromonas hydrophila* subsp. *hydrophila* (Chester 1901) Stanier  
478 1943 (approved lists 1980). *Int J Syst Evol Microbiol* 52:705–712.

- 479 5. Martinez-Murcia AJ, Saavedra MJ, Mota VR, Maier T, Stackebrandt E., Cousin S. 2008.  
480 *Aeromonas aquariorum* sp. nov., isolated from aquaria of ornamental fish. *Int J Syst Evol*  
481 *Microbiol* 58:1169–1175.
- 482 6. Colston SM, Fullmer MS, Beka L, Lamy B, Gogarten JP, Graf J. 2014. Bioinformatic  
483 genome comparisons for taxonomic and phylogenetic assignments using *Aeromonas* as a test  
484 case. *mBio*5:e02136-14.
- 485 7. Beaz-Hidalgo R, Latif-Eugenin F, Hossain MJ, Berg K, Niemi RM, Rapala J, Lyra C, Liles  
486 MR, Figueras MJ. 2015. *Aeromonas aquatica* sp. nov., *Aeromonas finlandiensis* sp. nov. and  
487 *Aeromonas lacus* sp. nov. isolated from finnish waters associated with cyanobacterial  
488 blooms. *Syst Appl Microbiol* 38:161–168.
- 489 8. Figueras MJ, Alperi A, Saavedra MJ, Ko WC, Gonzalo N, Navarro M, Martinez-Murcia  
490 AJ. 2009. Clinical relevance of the recently described species *Aeromonas aquariorum*. *J Clin*  
491 *Microbiol* 47 (2009) 3742–3746.
- 492 9. Janda JM, Abbott SL. 2010. The genus *Aeromonas*: taxonomy, pathogenicity, and  
493 infection. *Clin Microbiol Rev* 23:35–73.
- 494 10. Beaz-Hidalgo R, Martinez-Murcia A, Figueras MJ. 2013. Reclassification of *Aeromonas*  
495 *hydrophila* subsp. *dhakensis* Huys et al., 2002 and *Aeromonas aquariorum* Martinez-Murcia  
496 et al., 2008 as *Aeromonas dhakensis* sp. nov. comb nov. and emendation of the species  
497 *Aeromonas hydrophila*. *Syst Appl Microbiol* 36:171–176.
- 498 11. Pu W, Guo G, Yang N, Li Q, Yin F, Wang P, Zheng J, Zheng J. 2019. Three species of  
499 *Aeromonas* (*A. dhakensis*, *A. hydrophila* and *A. jandaei*) isolated from freshwater crocodiles  
500 (*Crocodylus siamensis*) with pneumonia and septicemia. *Lett Appl Microbiol* 68:212–218.

- 501 12. Chen PL, Wu CJ, Chen CS, Tsai PJ, Tang HJ, Ko WC. 2014. A comparative study of  
502 clinical *Aeromonas dhakensis* and *Aeromonas hydrophila* isolates in southern Taiwan:  
503 *A. dhakensis* is more predominant and virulent. *Clin Microbiol Infect* 20:O428–O434.
- 504 13. Chen PL, Wu CJ, Tsai PJ, Tang HJ, Chuang YC, Lee NY, Lee CC, Li CW, Li MC, Chen  
505 CC, Tsai HW, Ou CC, Chen CS, Ko WC. 2014. Virulence diversity among bacteremic  
506 *Aeromonas* isolates: *Ex vivo*, animal, and clinical evidences. *PLoS One* 9:e111213.
- 507 14. Wu C-J, Chen P-L, Hsueh P-R, Chang M-C, Tsai P-J., Shih H-I, Wang H-C, Chou P-H.,  
508 Ko W-C. 2015. Clinical implications of species identification in monomicrobial *Aeromonas*  
509 bacteremia. *PLoS One* 10:e0117821.
- 510 15. Aravena-Roman M, Harnett GB, Riley TV, Inglis TJ, Chang BJ. 2011. *Aeromonas*  
511 *aquariorum* is widely distributed in clinical and environmental specimens and can be  
512 misidentified as *Aeromonas hydrophila*. *J Clin Microbiol* 49:3006–3008.
- 513 16. Grim CJ, Kozlova EV, Ponnusamy D, Fitts EC, Sha J, Kirtley ML. et al. 2014. Functional  
514 genomic characterization of virulence factors from necrotizing fasciitis-causing strains of  
515 *Aeromonas hydrophila*. *Appl Environ Microbiol* 80:4162–4183.
- 516 (17) I. Sedlacek, E. Krejci, A. Andelova, M. Sedlackova, I. Porazilova, P. Holochova,  
517 *Aeromonas hydrophila* subsp. *dhakensis*—a causative agent of gastroenteritis imported into  
518 the Czech Republic. *Ann Agric Environ Med* 19 (2012) 409–413.
- 519 18. Puthuchear SD, Puah SM, Chua KH. 2012. Molecular characterization of clinical  
520 isolates of *Aeromonas* species from Malaysia. *PLoS One* 7:e30205.9.
- 521 19. Yano Y, Hamano K, Tsutsui I, Aue-Umneoy D, Ban M, Satomi M. 2015. Occurrence,  
522 molecular characterization, and antimicrobial susceptibility of *Aeromonas* spp. in marine  
523 species of shrimps cultured at inland low salinity ponds. *Food Microbiol* 47:21–27.



- 524 20. Cascon A, Yugueros J, Temprano A, Sanchez M, Hernanz C, Luengo JM, Naharro G.  
525 2000. A major secreted elastase is essential for pathogenicity of *Aeromonas hydrophila*.  
526 *Infect Immun* 68:3233–3241.
- 527 21. Chacon MR, Figueras MJ, Castro-Escarpulli G, Soler L, Guarro J. 2003. Distribution of  
528 virulence genes in clinical and environmental isolates of *Aeromonas* spp. *Antonie Van*  
529 *Leeuwenhoek* 84:269–278.
- 530 22. Richards GP. 2014. Bacteriophage remediation of bacterial pathogens in aquaculture: a  
531 review of the technology. *Bacteriophage* 4:e975540.
- 532 23. Altamirano FLG, Barr JJ. 2019. Phage Therapy in the Postantibiotic Era. *Clin Microbiol*  
533 *Rev* 32:e00066–e118.
- 534 24. McCalli S, Sacher JC, Zheng J, Chan BK. 2019. Current state of compassionate phage  
535 therapy. *Viruses* 11:343.
- 536 25. Jun JW, Kim JH, Shin SP, Han JE, Chai JY, Park SC. 2013. Characterization and  
537 complete genome sequence of the *Shigella* bacteriophage pSf-1. *Res Microbiol* 164:979–986.
- 538 26. Easwaran M, Dananjaya SHS, Park SC, Lee J, Shin H-J, De Zoysa M. 2017.  
539 Characterization of bacteriophage pAh-1 and its protective effects on experimental infection  
540 of *Aeromonas hydrophila* in Zebrafish (*Danio rerio*). *J Fish Dis* 40:841–846.
- 541 27. El-Araby DA, El-Didamony G, Megahed M. 2016. New approach to use phage therapy  
542 against *Aeromonas hydrophila* induced motile *Aeromonas* septicemia in Nile tilapia. *J Mar*  
543 *Sci. Res Dev* 6:2.
- 544 28. Abedon ST, Thomas-Abedon C. 2010. Phage therapy pharmacology. *Curr Pharm*  
545 *Biotechnol* 11:28–47.

- 546 29. Pringsulaka O, Patarasinpaiboon N, Suwannasai N, Atthakor W, Rangsiruji A. 2011.  
547 Isolation and characterisation of a novel *Podoviridae*-phage infecting *Weissella cibaria* N 22  
548 from Nham. a Thai fermented pork sausage. *Food Microbiol* 28:518–525.
- 549 30. Han ZR, Sun JF, Lv AJ, Sung Y, Shi HY, Hu XC, Xing KZ. 2017. Isolation,  
550 identification and characterization of *Shewanella* algae from reared tongue sole, *Cynoglossus*  
551 *semilaevis* Günther. *Aquaculture* 468:356–362.
- 552 31. Clinical and Laboratory Standards Institute (CLSI). 2020. Performance standards for  
553 antimicrobial susceptibility testing of bacteria isolated from aquatic animals (3rd ed. Clinical  
554 and Laboratory Standards Institute, Wayne, PA.
- 555 32. Adams MH. 1959. Bacteriophages. Interscience Publishers, New York, USA.
- 556 33. Terzaghi BE, Sandine WE. 1975. Improved medium for lactic streptococci and their  
557 bacteriophages. *Appl Microbiol* 29:807–813.
- 558 34. Chopin MC, Chopin A, Roux C. 1976. Definition of bacteriophage groups according to  
559 their action on mesophilic lactic streptococci. *Appl Environ Microbiol* 32:741–746.
- 560 35. Sunthornthummas S, Doi K, Rangsiruji A, Sarawaneeyaruk S, Pringsulaka O. 2017.  
561 Isolation and characterization of *Lactobacillus paracasei* LPC and phage  $\Phi$ T25 from  
562 fermented milk. *Food Control* 73:1353–1361.
- 563 36. Chow JJ, Batt CA, Sinskey AJ. 1998. Characterization of *Lactobacillus bulgaricus*  
564 bacteriophage CH2. *Appl Environ Microbiol* 54:1138–1142.
- 565 37. Bankevich A, Nurk S, Antipov D, Gurevich AA, Dvorkin M, Kulikov AS, Lesin VM,  
566 Nikolenko SI, Pham S, Prjibelski AD, Pyshkin AV, Sirotkin AV, Vyahhi N, Tesler G,  
567 Alekseyev MA, Pevzner PA. 2012. SPAdes: A new genome assembly algorithm and its  
568 applications to single-cell sequencing. *J Comput Biol* 19:455–477.

- 569 38. Brown J, Pirrung M, McCue LA. 2017. Dashboard: integrates FastQC results into a web-  
570 based, interactive, and extensible FASTQ quality control tool. *Bioinformatics* 33:3137-3139.
- 571 39. Bolger AM, Lohse M, Usadel B. 2014. Trimmomatic: A flexible trimmer for Illumina  
572 sequence data. *Bioinformatics* 30:2114–2120.
- 573 40. Seemann T. 2014. Prokka: rapid prokaryotic genome annotation. *Bioinformatics* 30:2068-  
574 2069.
- 575 41. Chan PP, Lowe TM. 2019. tRNAscan-SE: Searching for tRNA Genes in Genomic  
576 Sequences. *Methods Mol Biol* 1962:1–14.
- 577 42. Liu B, Zheng D, Zhou S, Chen L, Yang J. 2022. VFDB 2022: a general classification  
578 scheme for bacterial virulence factors. *Nucleic Acids Res* 50:D912-D917.
- 579 43. Alcock BP, Raphenya AR, Lau TT, Tsang KK, Bouchard M, Edalatmand A, Huynh W,  
580 Nguyen ALV, Cheng AA, Liu S, Min SY. 2020. CARD 2020: antibiotic resistome  
581 surveillance with the comprehensive antibiotic resistance database. *Nucleic Acids Res*  
582 48:D517-D525.
- 583 44. Carattoli A, Zankari E, Garcia-Fernandez A, Voldby Larsen M, Lund O, Villa L,  
584 Aarestrup FM, Hasman H. 2014. PlasmidFinder and pMLST: in silico detection and typing of  
585 plasmids. *Antimicrob Agents Chemother* 58:3895-903.
- 586 45. Camacho C, Coulouris G, Avagyan V, Ma N, Papadopoulos J, Bealer K, Madden TL.  
587 2009. BLAST+: architecture and applications. *BMC Bioinformatics* 10:421.
- 588 46. Arndt D, Grant JR, Marcu A, Sajed T, Pon A, Liang Y, Wishart DS. 2016. PHASTER: a  
589 better, faster version of the PHAST phage search tool. *Nucleic Acids Res* 44:W16-W21.
- 590 47. Zhou Y, Liang Y, Lynch KH, Dennis JJ, Wishart DS. 2011. PHAST: A fast phage search  
591 tool. *Nucleic Acids Res* 39:W347–W352.

- 592 48. Tynecki P, Guziński A, Kazimierczak J, Jadczyk M, Dastyh J, Onisko A. 2020.  
593 PhageAI-bacteriophage life cycle recognition with machine learning and natural language  
594 processing. *bioRxiv*.
- 595 49. Grant JR, Stothard P. 2008. The CGView Server: a comparative genomics tool for  
596 circular genomes. *Nucleic Acids Res* 36:W181-W184.
- 597 50. Chuang HC, Ho YH, Lay CJ, Wang LS, Tsai YS, Tsai CC. 2011. Different clinical  
598 characteristics among *Aeromonas hydrophila*, *Aeromonas veronii* biovar *sobria* and  
599 *Aeromonas caviae* monomicrobial bacteremia. *J Korean Med Sci* 26:1415–1420.
- 600 51. Koehler JM, Ashdown LR. 1993. *In vitro* susceptibilities of tropical strains of *Aeromonas*  
601 species from Queensland, Australia, to 22 antimicrobial agents. *Antimicrob Agents*  
602 *Chemother* 37:905-907.
- 603 52. Ko WC, Yu KW, Liu CY, Huang CT, Leu HS, Chuang YC. 1996. Increasing antibiotic  
604 resistance in clinical isolates of *Aeromonas* strains in Taiwan. *Antimicrob Agents Chemother*  
605 40:1260-1262.
- 606 53. Liu CY, Huang YT, Liao CH, Hsueh PR. 2008. *In vitro* activities of tigecycline against  
607 clinical isolates of *Aeromonas*, *Vibrio*, and *Salmonella* species in Taiwan. *Antimicrob Agents*  
608 *Chemother* 52:2677-2679.
- 609 54. Liu YM, Chen YS, Toh HS, Huang CC, Lee YL, Ho CM, Liu YM, Chen YS, Toh HS,  
610 Huang CC, Lee YL, Ho CM, Lu PL, Ko WC, Chen YH, Wang JH, Tan HJ, Yu KW, Liu YC,  
611 Chuang YC, Xu Y, Ni Y, Liu CE, Hsueh PR. 2012. *In vitro* susceptibilities of non-  
612 Enterobacteriaceae isolates from patients with intra-abdominal infections in the Asia-Pacific  
613 region from 2003 to 2010: Results from the Study for Monitoring Antimicrobial Resistance  
614 Trends (SMART). *Int J Antimicrob Agents* 40:S11-S17.

- 615 55. Baoprasertkul P, Somsiri T, Boonyawiwat V. 2021. Use of veterinary medicines in Thai  
616 aquaculture: Current status, p 83–89. *In* Bondad-Reantaso MG, Arthur JR, Subasinghe RP  
617 (ed), Improving biosecurity through prudent and responsible use of veterinary medicines in  
618 aquatic food production, Food and Agriculture Organization of the United Nations (FAO),  
619 Rome, Italy.
- 620 56. Aravena-Roman M, Inglis TJ, Henderson B, Riley TV, Chang BJ. 2012. Antimicrobial  
621 susceptibilities of *Aeromonas* strains isolated from clinical and environmental sources to 26  
622 antimicrobial agents. *Antimicrob Agents Chemother* 56:1110–1112.
- 623 57. Bai M, Cheng Y-H, Sun X-Q, Wang Z-Y, Wang Y-X, Cui X-L, Xiao W. 2019. Nine  
624 novel phages from a plateau lake in southwest China: Insights into *Aeromonas* phage  
625 diversity. *Viruses* 11:615.
- 626 58. Anand T, Vaid RK, Bera B, Singh J, Barua S, Virmani N. et al. 2016. Isolation of a lytic  
627 bacteriophage against virulent *Aeromonas hydrophila* from an organized equine farm. *J Basic*  
628 *Microbiol* 56:432–437.
- 629 59. Jun JW, Kim HJ, Yun SK, Chai JY, Park SC. 2015. Genomic structure of the *Aeromonas*  
630 bacteriophage pAh6-C and its comparative genomic analysis. *Arch Virol* 160:561–564.
- 631 60. Shen CJ, Liu YJ, Lu CP. 2012. Complete genome sequence of *Aeromonas hydrophila*  
632 phage CC2. *J Virol* 86:10900.
- 633 61. Vincent AT, Paquet VE, Bernatchez A, Tremblay DM, Moineau S, Charette SJ. 2017.  
634 Characterization and diversity of phages infecting *Aeromonas salmonicida* subsp.  
635 *salmonicida*. *Sci Rep* 7:7054.

- 636 62. Wang JB, Lin NT, Tseng YH, Weng SF. 2016. Genomic characterization of the novel  
637 *Aeromonas hydrophila* phage Ahp1 suggests the derivation of a new subgroup from  
638 phiKMV-like family. *PLoS One* 11:e0162060.
- 639 63. Yuan S, Chen L, Liu Q, Zhou Y, Yang J, Deng D, Li, H, Ma Y. 2018. Characterization  
640 and genomic analyses of *Aeromonas hydrophila* phages AhSzq-1 and AhSzw-1, isolates  
641 representing new species within the T5virus genus. *Arch Virol* 163:1985–1988.
- 642 64. Pereira C, Duarte J, Costa P, Braz M, Almeida A. 2022. Bacteriophages in the control of  
643 *Aeromonas* sp. in aquaculture systems: An integrative view. *Antibiotics* 11:163.
- 644 65. Payne RJ, Jansen VA. 2003. Pharmacokinetic principles of bacteriophage therapy. *Clin*  
645 *Pharmacokinet* 42:315–325.
- 646 66. Payne RJ, Phil, D, Jansen VA. 2000. Phage therapy: the peculiar kinetics of self-  
647 replicating pharmaceuticals. *Clin Pharmacol Ther* 68:225–230.
- 648 67. Ly-Chatain MH. 2014. The factors affecting effectiveness of treatment in phages therapy.  
649 *Front Microbiol* 5:51.
- 650 68. Malik S, Nehra K, Rana J S. 2021. Bacteriophage cocktail and phage antibiotic synergism  
651 as promising alternatives to conventional antibiotics for the control of multi-drug-resistant  
652 uropathogenic *Escherichia coli*. *Virus Res* 302:198496.
- 653 69. Comeau AM, Tétart F, Trojet SN, Prère M-F, Krisch HM. 2007. Phage-Antibiotic  
654 Synergy (PAS):  $\beta$ -lactam and quinolone antibiotics stimulate virulent phage growth. *PLoS*  
655 *One* 2:e799.

## 1 Figure legends

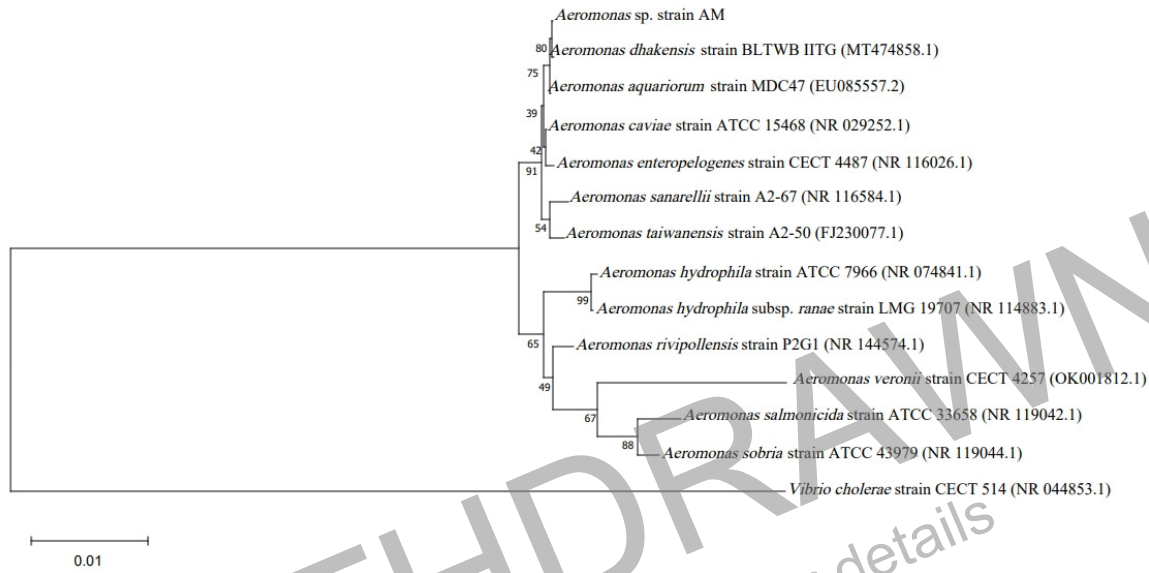

2

3 **Fig. 1** Phylogenetic tree of *Aeromonas* spp. based on the 16S rRNA gene using neighbor-  
4 joining method. Bootstrap values (%) of 1,000 replicates are represented on the branches.

5

6

7

8

9

10

11



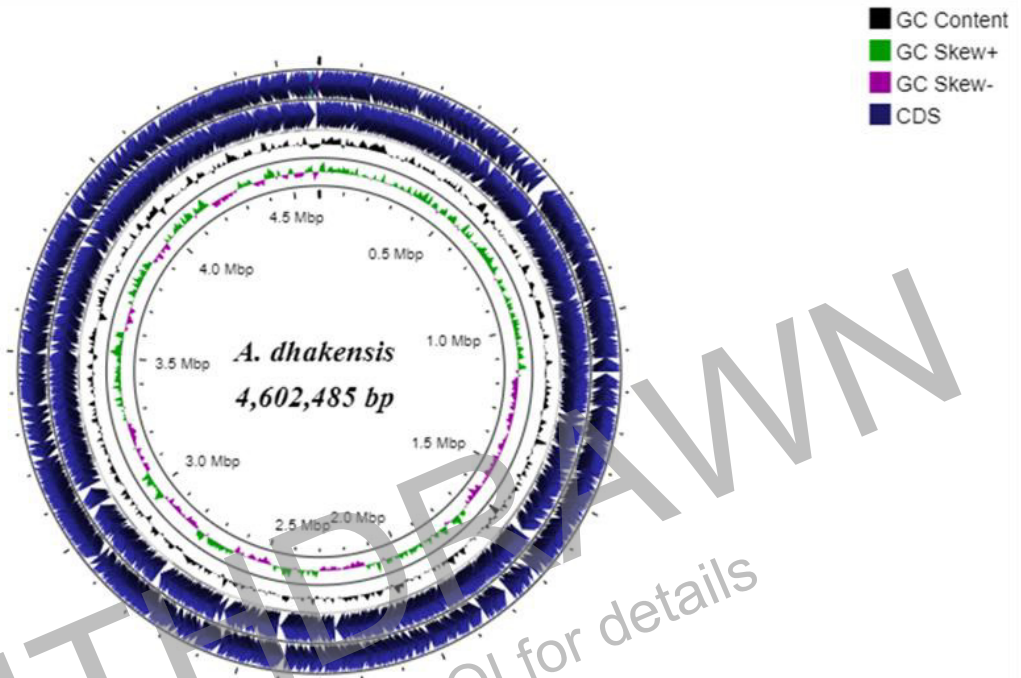

12

13 **Fig. 2** Circular representation of the *A. dhakensis* AM genome. The following characteristics  
14 are shown from the outside to the center of the diagram. Circle 1: coding sequence (CDS) on  
15 the reverse strand, circle 2: coding sequence (CDS) on the forward strand, circle 3: GC  
16 contents, circle 5: GC skew values (GC skew+ shown in green, GC skew- shown in pink).

17

18

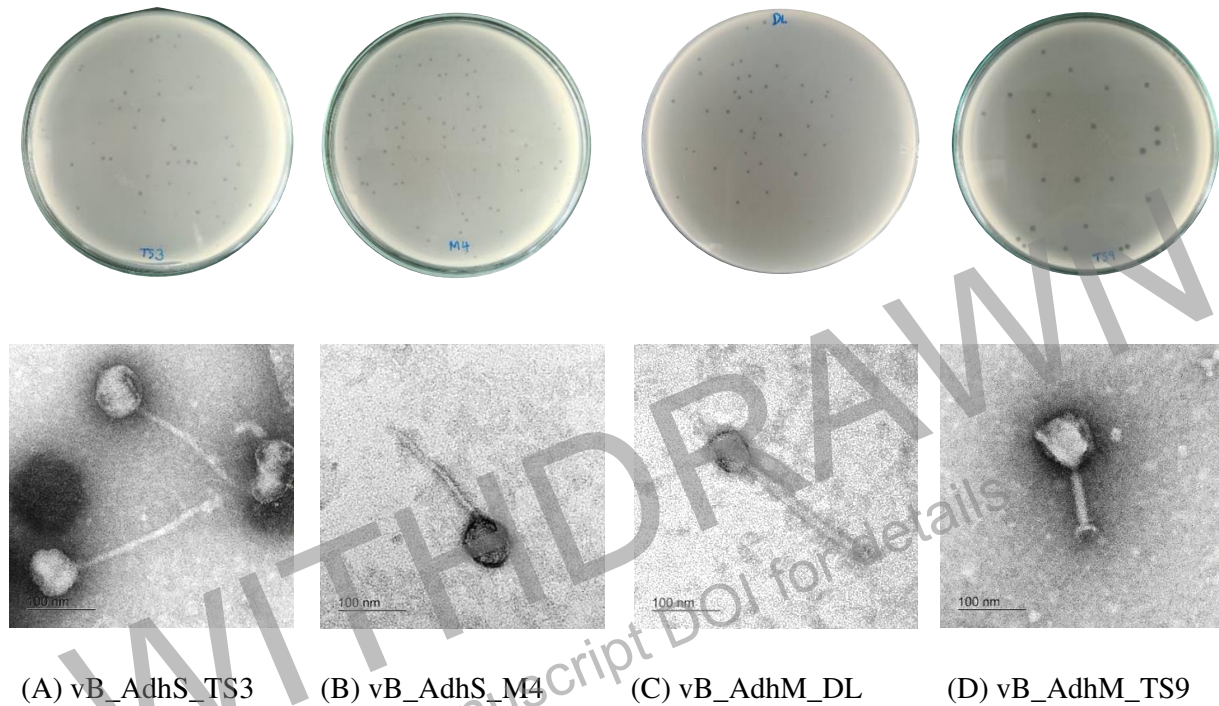

19

20 **Fig. 3** Plaques and TEM images of phage vB\_AdhS\_TS3 (A), vB\_AdhS\_M4 (B),  
21 vB\_AdhM\_DL (C), and vB\_AdhM\_TS9 (D). Scale bar = 100 nm.

22

23

24

25

26

27

28

29

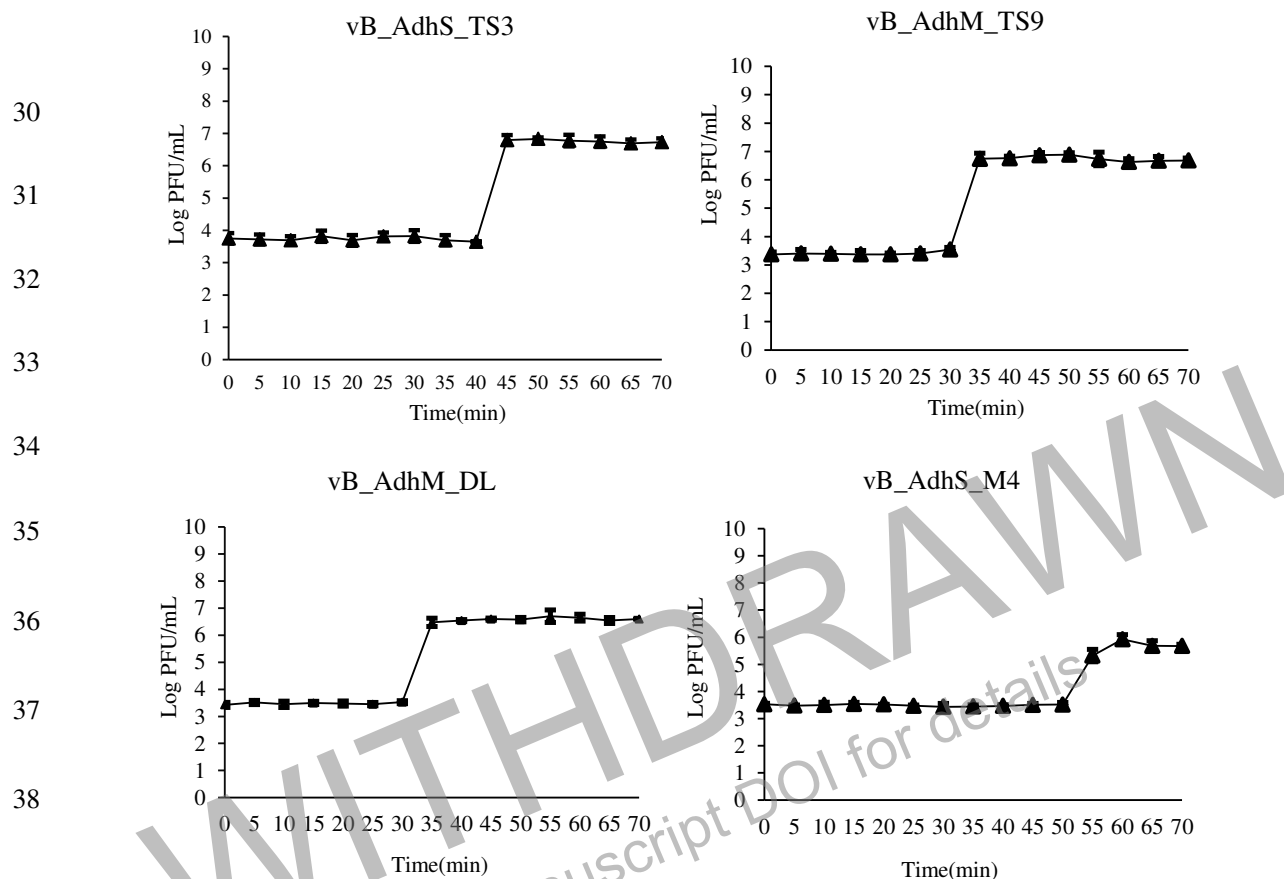

**Fig. 4** One-step growth curve of vB\_AdhS\_TS3 (A), vB\_AdhM\_DL (B), vB\_AdhM\_TS9 (C), and vB\_AdhS\_M4 (D). Data are the mean of triplicate independent experiments with standard deviation.

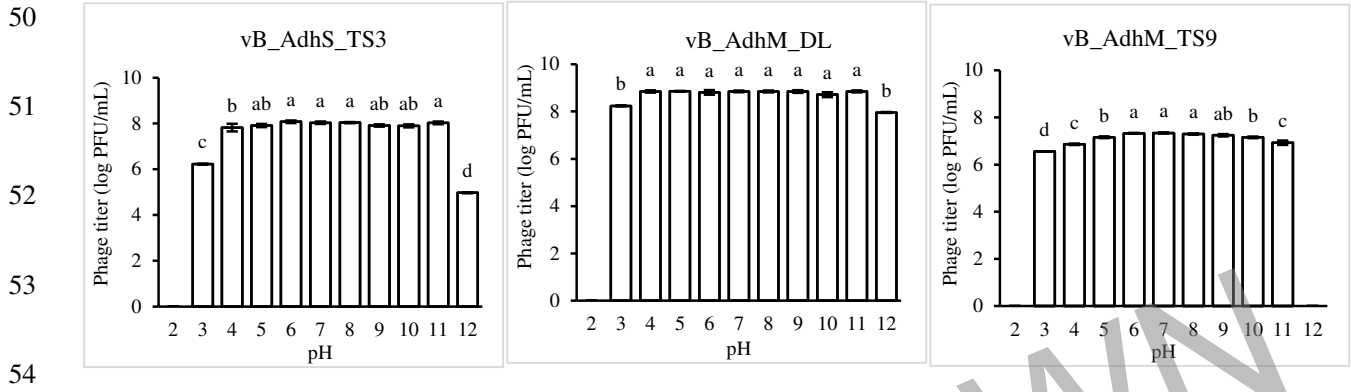

55 **Fig. 5** pH stability of phages vB\_AdhS\_TS3, vB\_AdhM\_DL, and vB\_AdhM\_TS9. Phages  
56 were incubated for 1 h under different pH values. The values are the mean of three  
57 determinations. Different letters indicate significant differences between pH treatments ( $p <$   
58 0.05).

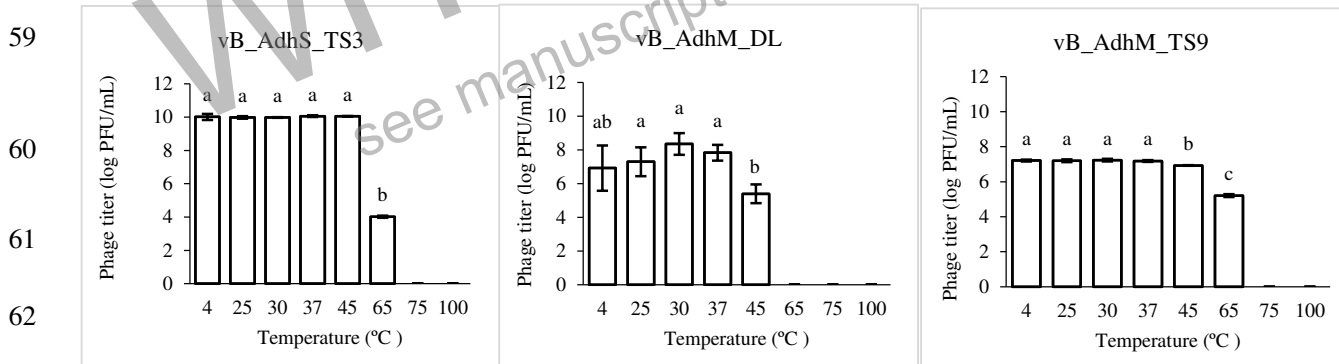

63 **Fig. 6** Thermal stability of phages vB\_AdhS\_TS3, vB\_AdhM\_DL, and vB\_AdhM\_TS9.  
64 Phages were incubated for 1 h at different temperatures. The values are the mean of three  
65 determinations. Different letters indicate significant differences between pH treatments ( $p <$   
66 0.05).

67

68

69

70

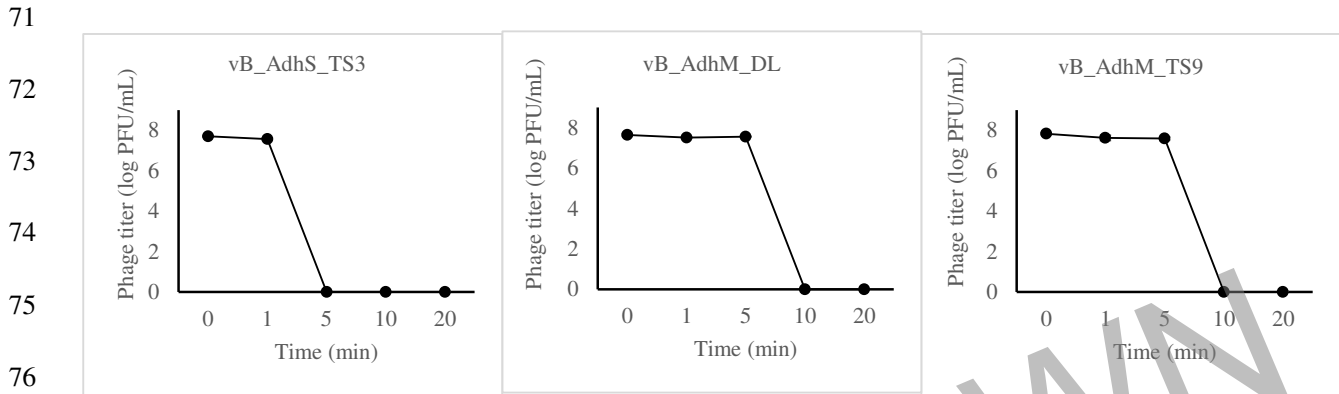

77 **Fig. 7** Thermal stability of phages vB\_AdhS\_TS3, vB\_AdhM\_DL, and vB\_AdhM\_TS9 at  
78 100°C.

79

80

81

82

83

84

85

86

87

88

89

90

91

92  
93  
94  
95  
96  
97  
98  
99  
100  
101  
102  
103  
104  
105  
106  
107  
108

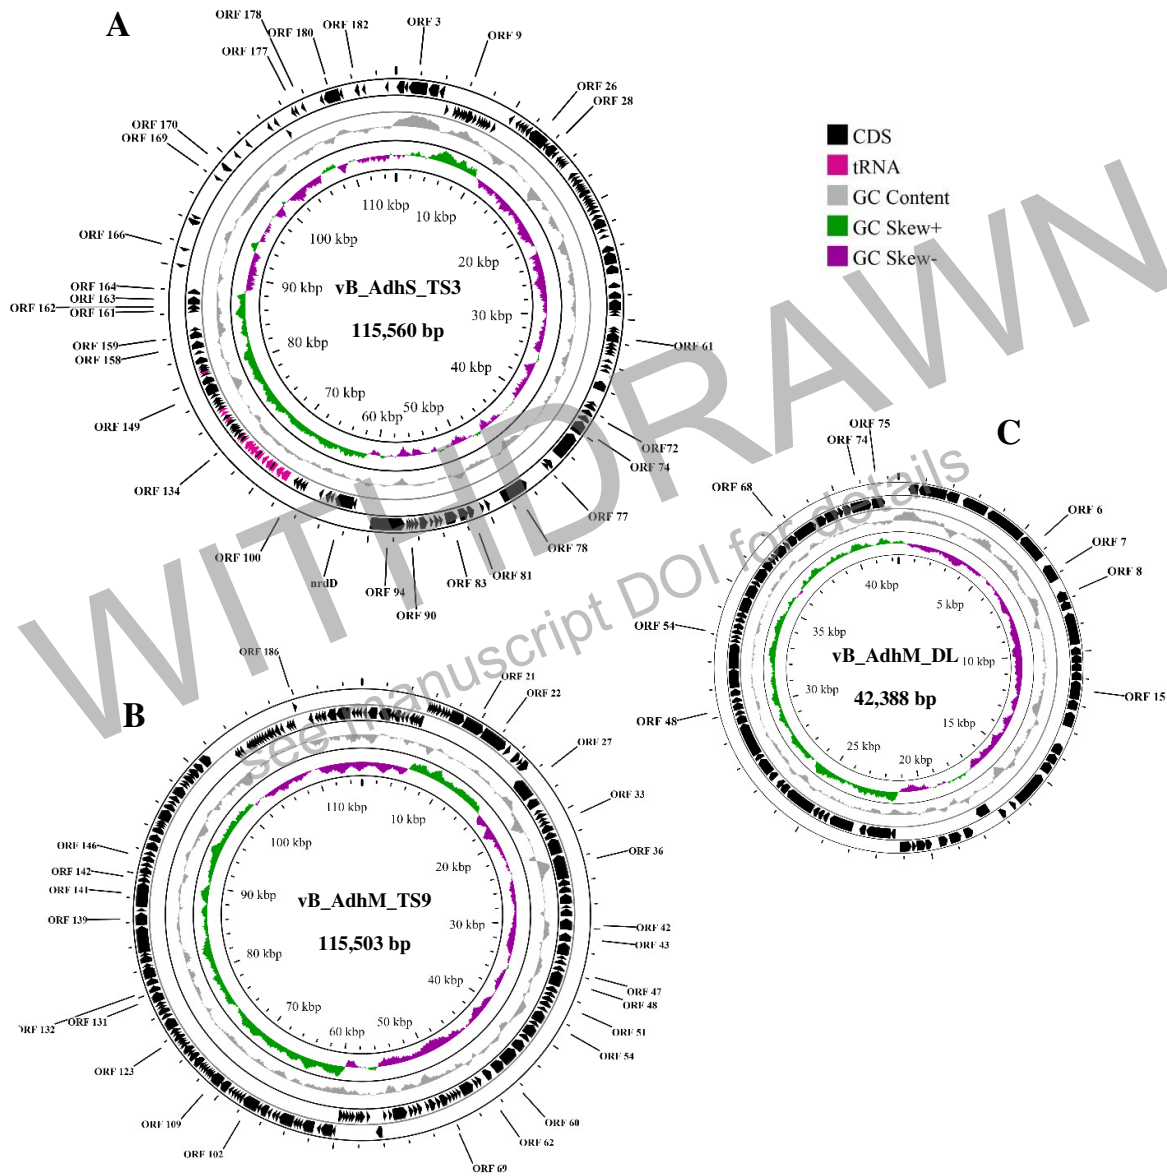

109 **Fig. 8** The genome map of three phages A) vB\_AdhS\_TS3 B) vB\_AdhM\_TS9 C)  
110 vB\_AdhM\_DL. Circles from outermost to innermost correspond to predicted genes (BLASTp,  
111 nr database, E value of  $<10^{-5}</math>), reverse strand, and GC content.$

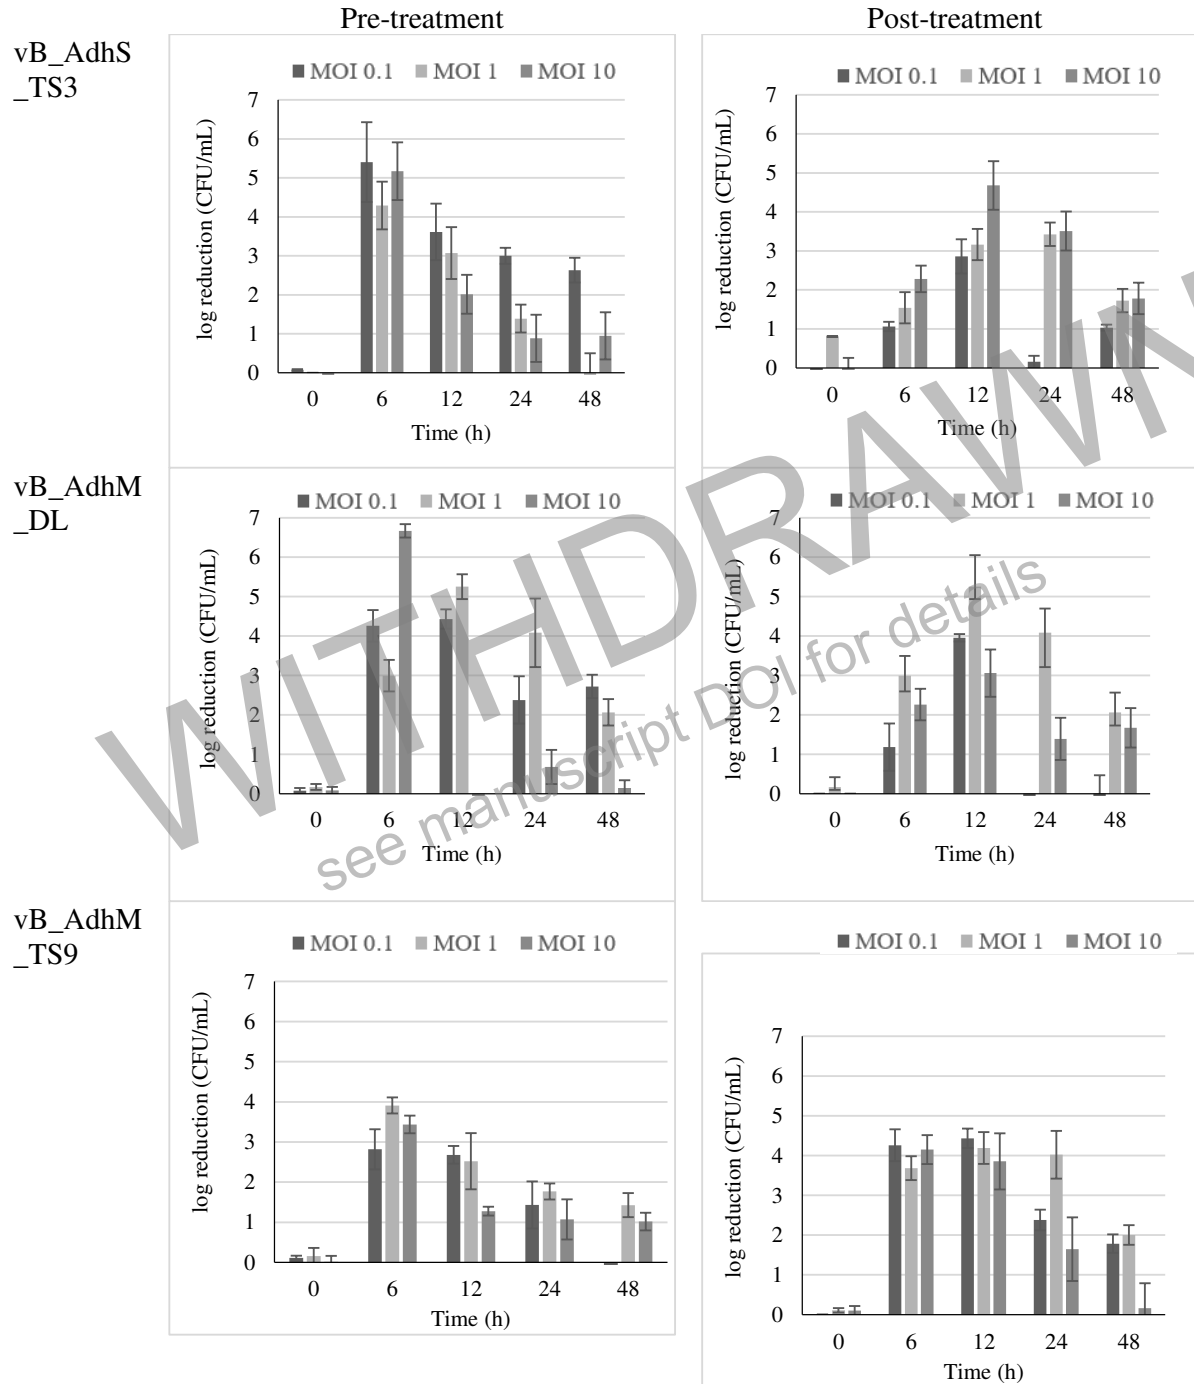

112 **Fig 9.** The log reduction in *A. dhakensis* number in pre- and post-treatment using single phage  
113 vB\_AdhS\_TS3, vB\_AdhM\_DL and vB\_AdhM\_TS9. The data were expressed as mean  $\pm$  SD.  
114 All assays were carried out in triplicates.

115

116



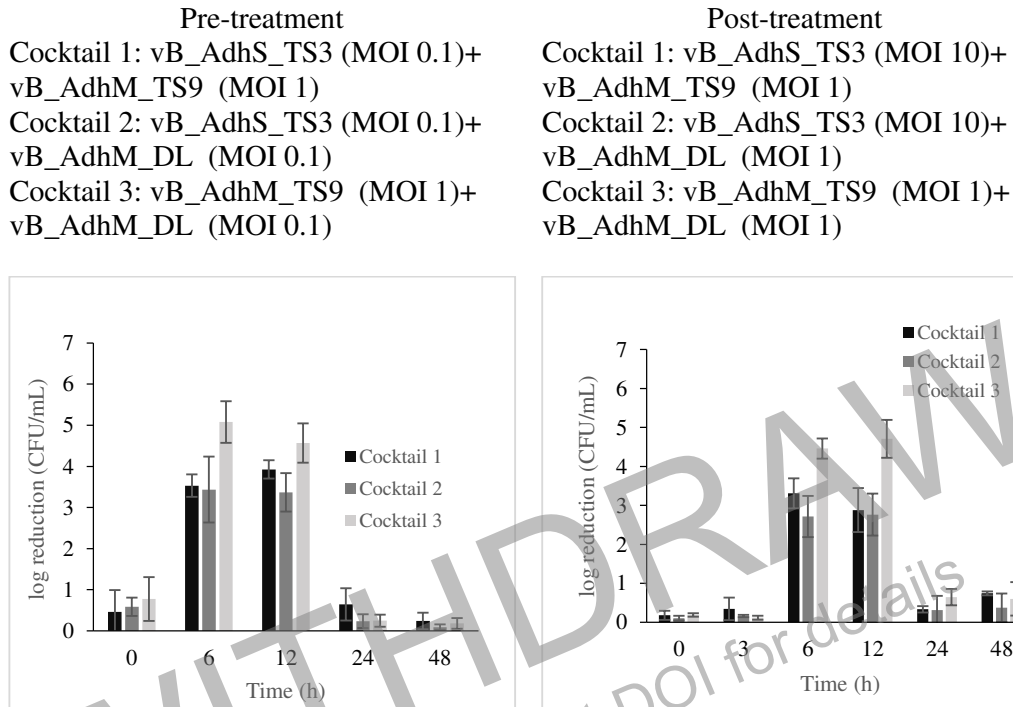

117  
118 **Fig. 10** The log reduction in *A. dhakensis* number in pre- and post-treatment groups using phage  
119 cocktail vB\_AdhS\_TS3, vB\_AdhM\_DL and vB\_AdhM\_TS9. The data are expressed as  
120 mean  $\pm$  SD. All assays were carried out in triplicates.

121  
122  
123  
124  
125  
126  
127  
128  
129  
130  
131  
132  
133

Cocktail 1:  
vB\_AdhS\_TS3  
(MOI 0.1)+  
vB\_AdhM\_TS9  
(MOI 1)

Pre-treatment (200 µL)

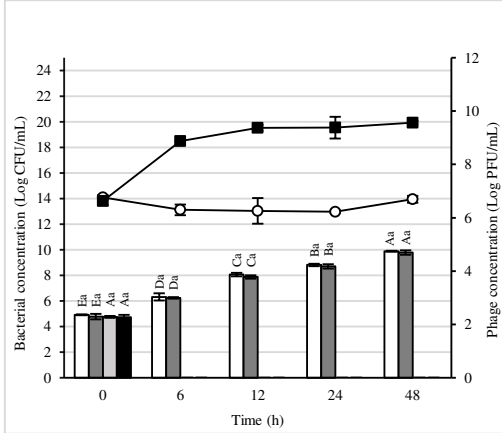

Pre-treatment (20 mL)

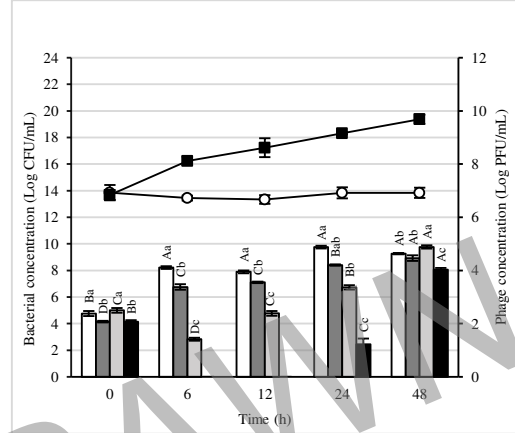

Cocktail 2:  
vB\_AdhS\_TS3  
(MOI 0.1)+  
vB\_AdhM\_DL  
(MOI 0.1)

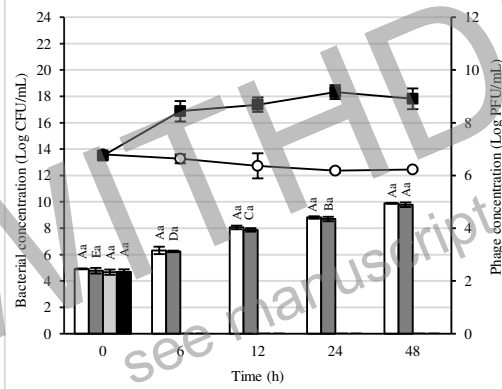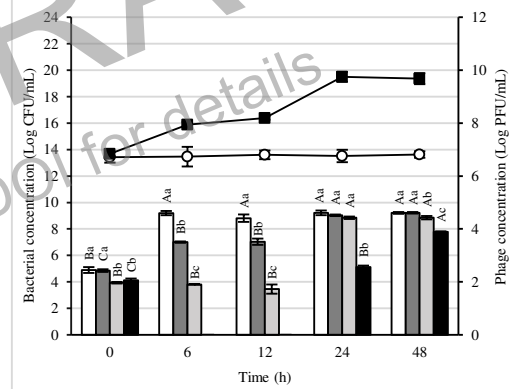

Cocktail 3:  
vB\_AdhM\_TS9  
(MOI 1)+  
vB\_AdhM\_DL  
(MOI 0.1)

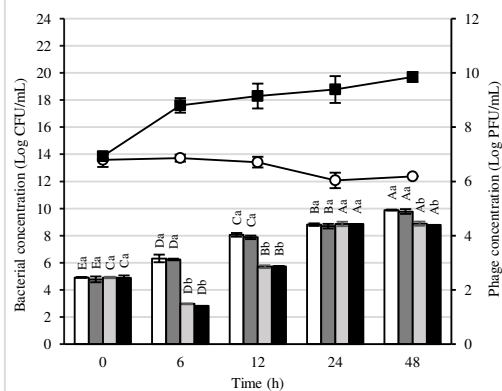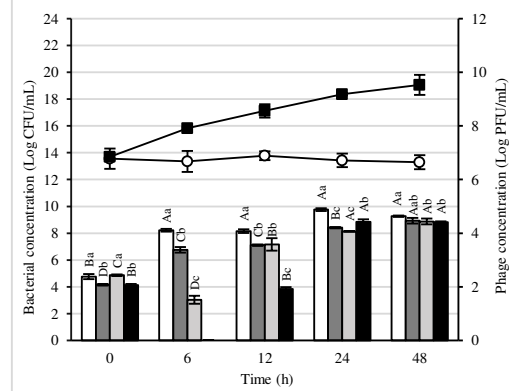

□ Bacteria control    ■ AMX    ▨ Phage cocktail    ■ Phage cocktail + 1/2 AMX    ○ Phage control    ● Bacteria plus phage

134

135

136

137

138

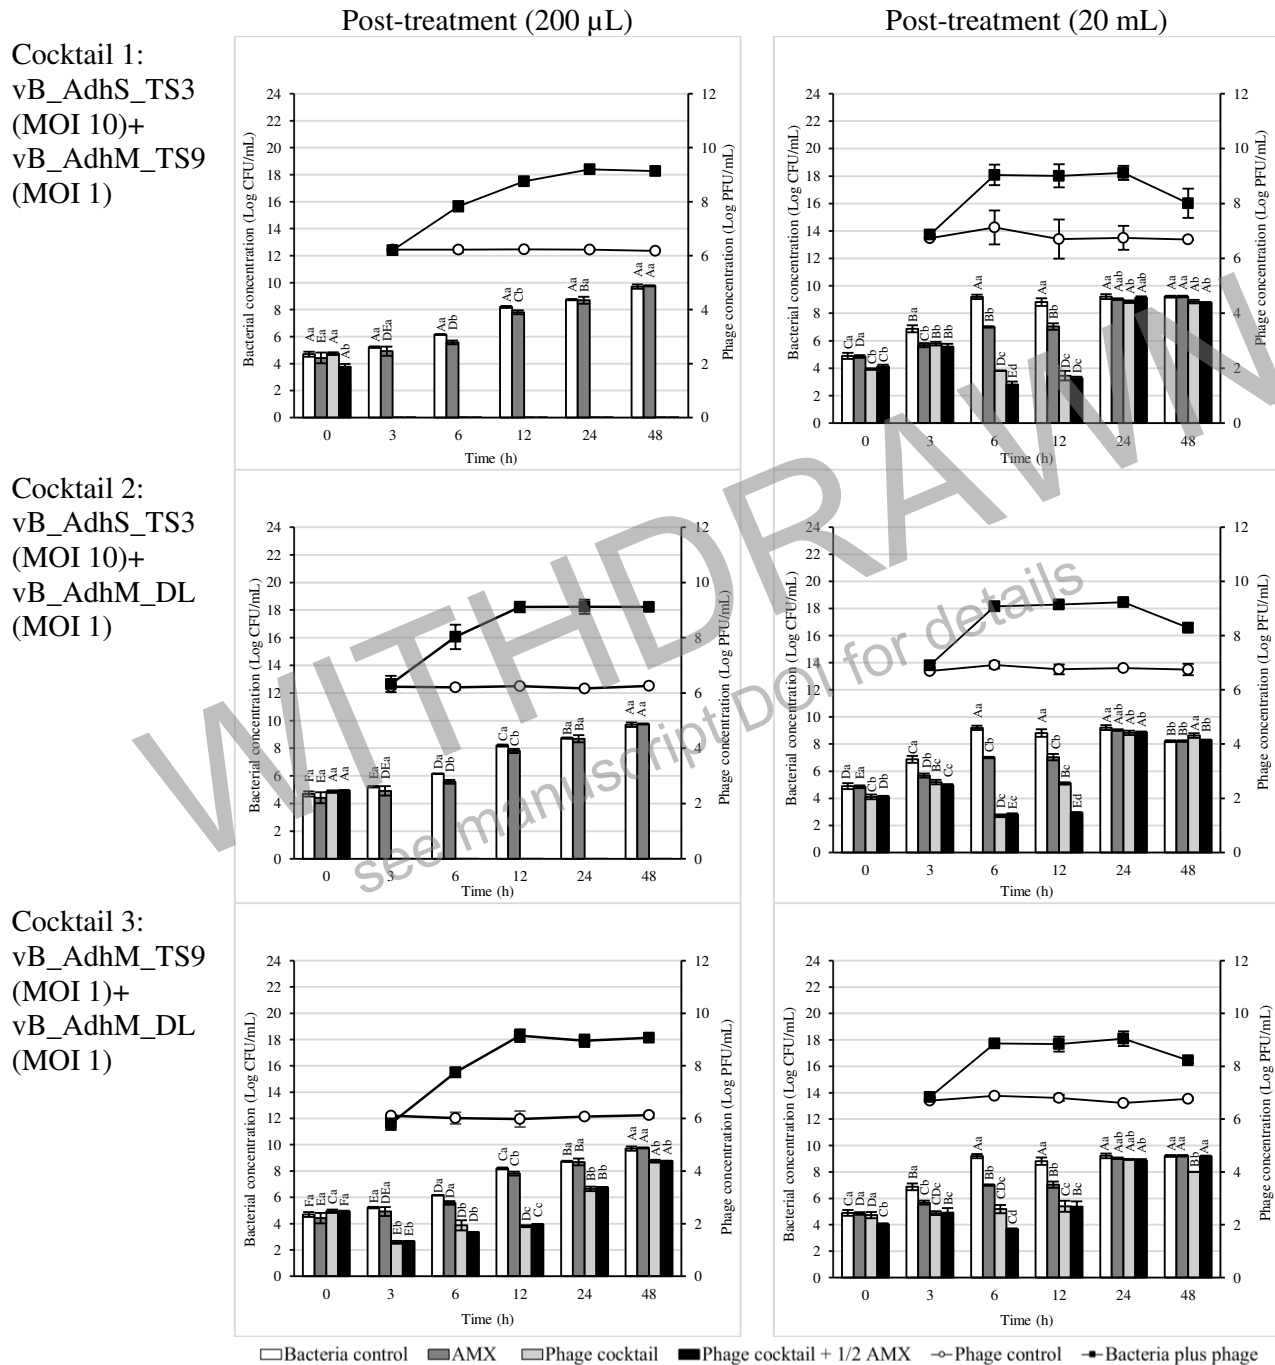

139

140 **Fig. 11** Effect of phage cocktail and amoxicillin combination at 1/2 MIC against *A. dhakensis*  
 141 AM. The bar graph represents the bacterial concentration (log CFU/ mL), and the line graph  
 142 represents the phage concentration (log PFU/ mL). The data are expressed as mean ± SD. All  
 143 assays were carried out in triplicates. Each lowercase label corresponds to a significantly

144 different ( $p < 0.05$ ) bacterial concentration within each time point. Capital letters denote  
145 significantly distinct ( $p < 0.05$ ) bacterial concentrations and time points compared to each other  
146 time point within the same conditions.

147

WITHDRAWN  
see manuscript DOI for details

1 **Table legends**

2 **Table 1** Biochemical tests of *A. dhakensis* AM

| Biochemical tests                   | Results |
|-------------------------------------|---------|
| Indole                              | +       |
| Methyl red                          | +       |
| Voges-Proskauer                     | +       |
| Citrate                             | +       |
| Hemolysis                           | β       |
| Deoxyribonuclease                   | +       |
| Gelatinase                          | +       |
| Catalase                            | +       |
| Oxidase                             | +       |
| Oxidative/fermentation glucose test | F       |
| Motility                            | +       |
| Urease                              | +       |
| Nitrate                             | +       |
| TSI (Acid/Alkali)                   | A/A     |
| Arginine dihydrolase                | +       |
| Lysine decarboxylase                | +       |
| Ornithine decarboxylase             | -       |
| Acid from                           |         |
| Lactose                             | -       |
| Sucrose                             | +       |
| L-arabinose                         | -       |
| Mannitol                            | +       |
| Salicin                             | +       |

3 + represents positive, - represents negative, and F represents fermentation.

4

5 **Table 2** Antibiotic susceptibility test

| Antibiotics     | MIC breakpoints ( $\mu\text{g/mL}$ ) <sup>a</sup> |              |           | MIC ( $\mu\text{g/mL}$ ) | Interpretation |
|-----------------|---------------------------------------------------|--------------|-----------|--------------------------|----------------|
|                 | Susceptible                                       | Intermediate | Resistant |                          |                |
| Amoxicillin     | $\leq 4$                                          | 8            | $> 8$     | 24                       | R              |
| Chloramphenicol | $\leq 8$                                          | 16           | $\geq 32$ | 0.75                     | S              |
| Doxycycline     | $\leq 4$                                          | 8            | $\geq 16$ | 3                        | S              |
| Erythromycin    | N/A                                               | N/A          | N/A       | 8                        | -              |
| Gentamicin      | $\leq 4$                                          | 8            | $\geq 16$ | 0.50                     | S              |
| Tetracycline    | $\leq 4$                                          | 8            | $\geq 16$ | 12                       | I              |

6 <sup>a</sup> MIC breakpoints for *Aeromonas* spp. were performed using Clinical and Laboratory  
7 Standards Institute (CLSI) 2020 guidelines.

8 <sup>b</sup> N/A, no data available.

9  
10  
11  
12  
13  
14  
15  
16  
17

18 **Table 3** Genome features of *A. dhakensis* AM

| Attribute                           | <i>A. dhakensis</i> AM value |
|-------------------------------------|------------------------------|
| Genome size (bp)                    | 4,602,485                    |
| Number of contigs                   | 118                          |
| N50                                 | 125671                       |
| L50                                 | 11                           |
| GC content (%)                      | 61.9                         |
| Number of coding sequences          | 4256                         |
| Number of RNAs                      | 130                          |
| Antimicrobial resistance (AMR) gene | 8                            |
| Prophage                            | 5                            |
| Virulence genes                     | 137                          |
| GenBank accession                   | JAPHNH000000000              |
| BioSample accession                 | SAMN31666460                 |
| BioProject accession                | PRJNA899678                  |

19

20

21

22

23

24

25

26



27 **Table 4** Host range of four *A. dhakensis* phages. Clear lysis zone (+++), turbid lysis (++),  
28 weak lysis (+) and no lysis zone (-).

| Bacterial strains               | vB_AdhS_TS3 | vB_AdhS_M4 | vB_AdhM_DL | vB_AdhM_TS9 |
|---------------------------------|-------------|------------|------------|-------------|
| <i>A. dhakensis</i> AM          | +++         | +++        | +++        | +++         |
| <i>A. dhakensis</i> NGP8        | -           | -          | ++         | ++          |
| <i>A. dhakensis</i> TP3         | ++          | ++         | -          | ++          |
| <i>A. dhakensis</i> KSS5        | +++         | -          | +++        | -           |
| <i>A. dhakensis</i> AK3         | +++         | -          | +++        | -           |
| <i>A. dhakensis</i> SBKN4       | +           | -          | +          | -           |
| <i>A. hydrophila</i> DMST 2798  | -           | -          | -          | -           |
| <i>A. hydrophila</i> DMST 21250 | -           | -          | -          | -           |
| <i>A. hydrophila</i> DMST 25194 | -           | -          | -          | -           |
| <i>A. hydrophila</i> TISTR1321  | -           | -          | -          | -           |
| <i>A. caviae</i> DMST 25498     | -           | -          | -          | -           |
| <i>A. sobria</i> DMST 25185     | -           | -          | -          | -           |
| <i>A. sobria</i> DMST 12440     | -           | -          | -          | -           |
| <i>A. trota</i> ATCC 49657      | -           | -          | -          | -           |
| <i>A. veronii</i> ATCC 35624    | -           | -          | -          | -           |

29

30

31

32

33

34

35

36 **Table 5** The optimal MOI of phage vB\_AdhS\_TS3, vB\_AdhM\_TS9, vB\_AdhM\_DL, and  
37 vB\_AdhS\_M4

| Bacteria<br>(log CFU/mL) | Phages<br>(log PFU/mL) | MOI  | Phage titer after 2 h (log PFU/mL) |                         |                        |                        |
|--------------------------|------------------------|------|------------------------------------|-------------------------|------------------------|------------------------|
|                          |                        |      | vB_AdhS_TS3                        | vB_AdhM_DL              | vB_AdhM_TS9            | vB_AdhS_M4             |
| 8                        | 9                      | 10   | 9.68±0.05 <sup>a</sup>             | 10.41±0.06 <sup>a</sup> | 9.94±0.05 <sup>a</sup> | 8.85±0.25 <sup>a</sup> |
| 8                        | 8                      | 1    | 9.14±0.07 <sup>b</sup>             | 9.27±0.19 <sup>b</sup>  | 8.12±0.07 <sup>b</sup> | 7.38±0.06 <sup>b</sup> |
| 8                        | 7                      | 0.1  | 8.04±0.23 <sup>c</sup>             | 10.20±0.06 <sup>b</sup> | 8.06±0.20 <sup>a</sup> | 6.17±0.03 <sup>c</sup> |
| 8                        | 6                      | 0.01 | 7.23±0.22 <sup>d</sup>             | 10.30±0.09 <sup>c</sup> | 7.13±0.13 <sup>a</sup> | 5.73±0.06 <sup>d</sup> |

38 Phage titers after 2 h are presented as the mean ±standard deviation, n=3. Different lowercase letters  
39 indicate a significant difference in this column as a result of one-way ANOVA and post-hoc Tukey's  
40 test (p<0.05).

41

42

43

44

45

46

47

48

49

50

51

52

53

54

55 **Table 6** Genomic characterization of three bacteriophages targeting *A. dhakensis* AM

| Features                                                | vB_AdhS_TS3       | vB_AdhM_TS9       | vB_AdhM_DL        |
|---------------------------------------------------------|-------------------|-------------------|-------------------|
| NCBI accession                                          | OP820700          | OP820701          | OP820702          |
| Length                                                  | 115,560 bp        | 115,503 bp        | 42,388 bp         |
| Guanine-cytosine (G + C) content                        | 41.10%            | 35.34%            | 34.43%            |
| tRNAs (Ref= tRNAscan-SE v2.0)                           | 30                | -                 | -                 |
| Total CDS (Ref=Prokka v1.14)                            | 151               | 195               | 75                |
| Hypothetical proteins                                   | 121               | 175               | 66                |
| Functional proteins (Ref = Blastp, E<10 <sup>-5</sup> ) | 30                | 25                | 9                 |
| Virulence factor (Ref=VFDB)                             | -                 | -                 | -                 |
| Antimicrobial resistance genes (Ref = CARD)             | -                 | -                 | -                 |
| Lysogenic markers (Ref = Blastp)                        | -                 | -                 | -                 |
| Lifestyle (Ref = PhageAI)                               | Virulent (99.10%) | Virulent (90.70%) | Virulent (91.21%) |

56

57

58

59

60

61

62

63

64 **Table 7** Features of the ORFs of phage vB\_AdhS\_TS3, Predicted functions of proteins, and  
 65 best matches with databases

| ORF | Predicted function                                                      | Organism                    | E value                | Identity | Accession      |
|-----|-------------------------------------------------------------------------|-----------------------------|------------------------|----------|----------------|
| 3   | DNA transfer protein                                                    | Aeromonas phage AhSzw-1     | 0                      | 93.35%   | AZV02038.1     |
| 9   | pyruvate dehydrogenase (acetyl-transferring) E1 component subunit alpha | Aeromonas phage AhSzw-1     | $4.0 \times 10^{-43}$  | 72.00%   | YP_009800331.1 |
| 26  | nicotinamide phosphoribosyl transferase                                 | Aeromonas phage Akh-2       | 0                      | 91.87%   | AZV01835.1     |
| 28  | ribose-phosphate pyrophosphokinase                                      | Aeromonas phage AhSszq-1    | $9.0 \times 10^{-162}$ | 83.01%   | YP_009800055.1 |
| 61  | thymidylate synthase                                                    | Aeromonas phage Akh-2       | $6.0 \times 10^{-159}$ | 93.39%   | AZV01879.1     |
| 72  | ribonuclease HI                                                         | Aeromonas phage Akh-2       | $5.0 \times 10^{-86}$  | 76.92%   | AZV01894.1     |
| 74  | ribonucleotide reductase of class Ia (aerobic), beta subunit            | Aeromonas phage Akh-2       | 0.00E+00               | 97.59%   | AZV01896.1     |
| 77  | phosphate starvation-inducible protein                                  | Klebsiella phage JIPh_Kp127 | $2.0 \times 10^{-9}$   | 52.54%   | QFR57528.1     |
| 78  | DNA polymerase                                                          | Aeromonas phage AhSzw-1     | 0                      | 86.03%   | YP_009800255.1 |
| 81  | D5 protein                                                              | Aeromonas phage AhSszq-1    | $1.0 \times 10^{-108}$ | 84.95%   | YP_009800121.1 |
| 83  | DNA ligase                                                              | Aeromonas phage Akh-2       | 0                      | 95.33%   | AZV01917.1     |
| 90  | RNA pseudouridine synthase                                              | Aeromonas phage AhSzw-1     | $6.0 \times 10^{-17}$  | 53.12%   | YP_009800269.1 |
| 92  | putative replication origin binding protein                             | Aeromonas phage AhSszq-1    | 0                      | 84.51%   | YP_009800132.1 |
| 94  | ribonucleotide reductase of class III (anaerobic), large subunit        | Aeromonas phage Akh-2       | 0                      | 97.71%   | AZV01929.1     |
| 100 | endonuclease                                                            | Aeromonas phage Akh-2       | $3.0 \times 10^{-98}$  | 96.48%   | AZV01936.1     |
| 134 | toll-like protein                                                       | Aeromonas phage AhSzw-1     | $7.0 \times 10^{-20}$  | 76.92%   | YP_009800284.1 |
| 149 | nicotinamide-nucleotide adenylyl transferase                            | Aeromonas phage Akh-2       | 0                      | 97.38%   | AZV01956.1     |
| 158 | D11 protein                                                             | Aeromonas phage AhSszq-1    | $5.0 \times 10^{-138}$ | 85.98%   | YP_009800153.1 |
| 159 | putative recombination endonuclease, subunit D12                        | Aeromonas phage AhSszq-1    | $6.0 \times 10^{-83}$  | 72.90%   | YP_009800155.1 |
| 161 | putative exonuclease subunit 2                                          | Aeromonas phage AhSszq-1    | $1.0 \times 10^{-37}$  | 92.65%   | YP_009800157.1 |
| 162 | D14 protein                                                             | Aeromonas phage AhSszq-1    | $2.0 \times 10^{-51}$  | 83.70%   | YP_009800158.1 |
| 163 | flap endonuclease                                                       | Aeromonas phage AhSzw-1     | $4.0 \times 10^{-119}$ | 84.29%   | YP_009800308.1 |
| 164 | deoxyuridine 5'-triphosphate nucleotidohydrolase                        | Aeromonas phage Akh-2       | $7.0 \times 10^{-107}$ | 88.55%   | AZV01971.1     |
| 166 | tail fiber protein                                                      | Aeromonas phage 65.2        | $2.0 \times 10^{-17}$  | 53.01%   | APU01545.1     |
| 169 | tail length tape-measure protein                                        | Aeromonas phage Akh-2       | $2.0 \times 10^{-54}$  | 94.38%   | AZV01993.1     |
| 170 | tail protein Pb3                                                        | Aeromonas phage AhSzw-1     | $2.0 \times 10^{-95}$  | 93.71%   | YP_009800313.1 |
| 177 | major tail protein                                                      | Aeromonas phage AhSzw-1     | $9.0 \times 10^{-37}$  | 88.57%   | YP_009800316.1 |
| 178 | tail fiber protein                                                      | Aeromonas phage Akh-2       | $4.0 \times 10^{-27}$  | 98.08%   | AZV02017.1     |
| 180 | major capsid protein                                                    | Aeromonas phage Akh-2       | 0                      | 97.42%   | AZV02021.1     |
| 182 | portal protein                                                          | Aeromonas phage AhSszq-1    | $5.0 \times 10^{-82}$  | 90.30%   | YP_009800177.1 |

66

67

68

69

70 **Table 8** Features of the ORFs of phage vB\_AdhM\_TS9, predicted functions of proteins, and  
 71 best matches with databases

72

| ORF | Predicted function                                       | Organism                | E value                | Identity | Accession      |
|-----|----------------------------------------------------------|-------------------------|------------------------|----------|----------------|
| 21  | putative DNA primase/helicase                            | Aeromonas phage 2L372D  | 0                      | 98.49%   | YP_009846185.1 |
| 22  | DNA polymerase                                           | Aeromonas phage phiA009 | 0                      | 98.03%   | ULG01416.1     |
| 27  | putative tail fiber protein                              | Aeromonas phage phiA009 | $6.0 \times 10^{-55}$  | 91.59%   | ULG01421.1     |
| 33  | Ig-like domain-containing protein                        | Aeromonas phage phiA009 | $6.0 \times 10^{-95}$  | 62.36%   | ULG01426.1     |
| 36  | tail protein                                             | Aeromonas phage phiA009 | $3.0 \times 10^{-58}$  | 45.08%   | ULG01429.1     |
| 42  | putative tape measure protein                            | Aeromonas phage 4L372XY | 0                      | 91.40%   | YP_009846891.1 |
| 43  | putative tape measure protein                            | Aeromonas phage 4L372D  | $8.0 \times 10^{-151}$ | 97.80%   | YP_009846661.1 |
| 47  | structural protein                                       | Aeromonas phage phiA047 | $6.0 \times 10^{-74}$  | 67.31%   | ULG01831.1     |
| 48  | putative structural protein I                            | Aeromonas phage 4L372XY | 0                      | 86.64%   | YP_009846896.1 |
| 51  | putative RNA polymerase                                  | Aeromonas phage 2L372D  | $4.0 \times 10^{-120}$ | 98.79%   | YP_009846216.1 |
| 54  | putative major capsid protein                            | Aeromonas phage phiA047 | 0                      | 99.71%   | ULG01824.1     |
| 60  | terminase                                                | Aeromonas phage phiA047 | 0                      | 94.30%   | ULG01818.1     |
| 62  | putative terminase large subunit                         | Aeromonas phage 2L372D  | $5.0 \times 10^{-93}$  | 100.00%  | YP_009846226.1 |
| 69  | putative serine/threonine protein phosphatase            | Aeromonas phage LAh_6   | $2.0 \times 10^{-43}$  | 41.91%   | YP_009847268.1 |
| 102 | putative DNA ligase                                      | Aeromonas phage 2L372D  | 0                      | 85.37%   | YP_009846276.1 |
| 109 | 5'-3' exonuclease                                        | Aeromonas phage 4L372D  | 0                      | 93.37%   | YP_009846727.1 |
| 123 | ATP-binding protein                                      | Aeromonas phage phiA009 | $3.0 \times 10^{-114}$ | 96.36%   | ULG01509.1     |
| 131 | thymidylate synthase                                     | Aeromonas phage phiA047 | 0                      | 93.95%   | ULG01742.1     |
| 132 | dihydrofolate reductase                                  | Aeromonas phage phiA047 | $1.0 \times 10^{-130}$ | 97.80%   | ULG01741.1     |
| 138 | ribonucleoside-diphosphate reductase I subunit alpha     | Aeromonas phage 4L372XY | 0                      | 96.95%   | YP_009846985.1 |
| 139 | putative ribonucleoside diphosphate reductase beta chain | Aeromonas phage phiA009 | 0                      | 97.72%   | ULG01525.1     |
| 141 | anaerobic ribonucleoside-triphosphate reductase          | Aeromonas phage 4L372XY | 0                      | 97.27%   | YP_009846992.1 |
| 142 | anaerobic ribonucleotide reductase-activating protein    | Aeromonas phage 4L372XY | $5.0 \times 10^{-105}$ | 94.90%   | YP_009846993.1 |
| 146 | lysozyme                                                 | Aeromonas phage 4L372XY | $7.0 \times 10^{-127}$ | 96.70%   | YP_009846996.1 |
| 186 | VHS1027 protein                                          | Aeromonas phage 4L372XY | $4.0 \times 10^{-36}$  | 87.50%   | YP_009846823.1 |

73

74

75

76

77

78

79

80 **Table 9** Features of the ORFs of phage vB\_AdhM\_DL, Predicted functions of proteins, and  
81 best matches with databases

82

| ORF | Predicted function                   | Organism                     | E value                | Identity | Accession      |
|-----|--------------------------------------|------------------------------|------------------------|----------|----------------|
| 6   | terminase                            | Aeromonas phage phiA047      | 0                      | 94.30%   | ULG01818.1     |
| 7   | homing endonuclease                  | Shewanella sp. phage 1/40    | $1.0 \times 10^{-124}$ | 74.78%   | YP_009104092.1 |
| 8   | putative terminase large subunit     | Aeromonas phage 2L372D       | $5.0 \times 10^{-93}$  | 100.00%  | YP_009846226.1 |
| 15  | serine/threonine protein phosphatase | Pseudoalteromonas phage H101 | $4.0 \times 10^{-61}$  | 49.38%   | YP_009225557.1 |
| 48  | MazG                                 | Rheinheimera phage Barba5S   | $1.0 \times 10^{-69}$  | 85.59%   | YP_009822599.1 |
| 54  | 5'-3' exonuclease                    | Aeromonas phage 4L372D       | 0                      | 93.37%   | YP_009846727.1 |
| 68  | ATP-binding protein                  | Aeromonas phage phiA009      | $3.0 \times 10^{-114}$ | 96.36%   | ULG01509.1     |
| 74  | thymidylate synthase                 | Aeromonas phage phiA047      | 0                      | 93.95%   | ULG01742.1     |
| 75  | dihydrofolate reductase              | Aeromonas phage phiA047      | $1.0 \times 10^{-130}$ | 97.80%   | ULG01741.1     |

83

84

85

WITHDRAWN  
see manuscript DOI for details
